# Supplementary material for: Golgi/plastid‐type manganese superoxide dismutase involved in heat‐stress tolerance during grain filling of rice
Source: PubMed Central journal article supplement — Plant Biotechnol J. 2015 Jan 14;13(9):1251–63. doi: 10.1111/pbi.12314 (PMC6680209; doi:10.1111/pbi.12314), 2015-01-14
Supplement: PBI-13-1251-s004.pdf [file PBI-13-1251-s004.pdf]

**Table S1. Quantitative shotgun proteomic analysis of developing seeds of MSD1OE and WT at 4 and 10 DAF under hot and control conditions.**

WT, Nipponbare wild type; MSD1OE, Nipponbare MSD1 overexpressor. Hot condition = 33/28 °C (12/12 h); control condition = 28/23 °C (12/12 h). Numerical values in blue and red indicate  $\geq 2$ -fold upregulation and downregulation, respectively, in MSD1OE.

cTP: chloroplast transit peptide  
mTP: mitochondrial transit peptide  
SP: signal peptide  
NTS: nuclear transport signal  
PTS: peroxisome targeting signal

**Stress response**

| Accession                            | hot (light 12h, 33°C / dark 12h, 28°C) |         |                                |                                 | control (light 12h, 28°C / dark 12h, 23°C) |         |                                |                                 | Description                                                                                                                                           | Sorting signal<br>(localization predicted)                        |
|--------------------------------------|----------------------------------------|---------|--------------------------------|---------------------------------|--------------------------------------------|---------|--------------------------------|---------------------------------|-------------------------------------------------------------------------------------------------------------------------------------------------------|-------------------------------------------------------------------|
|                                      | Coverage                               | Peptide | Ratio<br>(MSD1OE/WT for 4days) | Ratio<br>(MSD1OE/WT for 10days) | Coverage                                   | Peptide | Ratio<br>(MSD1OE/WT for 4days) | Ratio<br>(MSD1OE/WT for 10days) |                                                                                                                                                       |                                                                   |
| <b>reactive oxygen scavenging</b>    |                                        |         |                                |                                 |                                            |         |                                |                                 |                                                                                                                                                       |                                                                   |
| P0C5C9                               | 37.29                                  | 29      | 0.562                          | <b>0.132</b>                    | 30.91                                      | 20      | 1.343                          | 1.967                           | 1-Cys peroxiredoxin A OS=Oryza sativa subsp. japonica GN=Os07g0638300 - [REHYA_ORYSJ]                                                                 | NTS (nucleus)                                                     |
| P0C5D5                               | 7.83                                   | 2       | <b>2.022</b>                   | 1.756                           | 15.21                                      | 12      | 1.067                          | 1.121                           | Peroxioredoxin Q, chloroplastic OS=Oryza sativa subsp. japonica GN=Os06g0196300 - [PRXQ_ORYSJ]                                                        | cTP (plastid)                                                     |
| P93407                               | 30.33                                  | 15      | <b>2.988</b>                   | <b>3.078</b>                    | 34.60                                      | 27      | 1.003                          | 1.067                           | Superoxide dismutase [Cu-Zn], chloroplastic OS=Oryza sativa subsp. japonica GN=SODCP - [SODCP_ORYSJ]                                                  | unclear (plastid, cytoplasm)                                      |
| Q0D840                               | 48.36                                  | 41      | 1.179                          | <b>2.383</b>                    | 40.98                                      | 60      | 1.301                          | 0.788                           | Thioredoxin H1 OS=Oryza sativa subsp. japonica GN=TRXH - [TRXH1_ORYSJ]                                                                                | none (cytoplasm)                                                  |
| Q10N21                               | 42.80                                  | 20      | <b>3.993</b>                   | <b>5.623</b>                    | 54.40                                      | 68      | 1.492                          | 0.987                           | L-ascorbate peroxidase 1, cytosolic OS=Oryza sativa subsp. japonica GN=APX1 - [APX1_ORYSJ]                                                            | none (cytoplasm)                                                  |
| Q6AJUK5                              | 4.80                                   | 1       | <b>2.054</b>                   | <b>3.988</b>                    | 16.59                                      | 7       | 1.267                          | 0.974                           | Peptide methionine sulfoxide reductase B3, chloroplastic OS=Oryza sativa subsp. japonica GN=MSRB3 - [MSRB3_ORYSJ]                                     | cTP (plastid)                                                     |
| Q6ER94                               | 26.44                                  | 9       | 1.843                          | <b>2.329</b>                    | 31.42                                      | 40      | 1.628                          | 1.010                           | 2-Cys peroxiredoxin BAS1, chloroplastic OS=Oryza sativa subsp. japonica GN=BAS1 - [BAS1_ORYSJ]                                                        | cTP (plastid)                                                     |
| Q6ZJ08                               | 1.61                                   | 1       | <b>5.117</b>                   | <b>4.124</b>                    | 26.21                                      | 18      | 1.657                          | 0.774                           | Monodehydroascorbate reductase OS=Oryza sativa subsp. japonica GN=OJ1150_A11.25 - [Q6ZJ08_ORYSJ]                                                      | SP (ER)                                                           |
| Q6ZJJ1                               | 13.75                                  | 5       | <b>2.029</b>                   | <b>4.853</b>                    | 28.52                                      | 18      | 1.772                          | 0.995                           | Probable L-ascorbate peroxidase 4 OS=Oryza sativa subsp. japonica GN=APX4 - [APX4_ORYSJ]                                                              | mTP (mitochondrion)                                               |
| Q7F8S5                               | 4.89                                   | 1       | <b>2.614</b>                   | <b>3.754</b>                    | 44.00                                      | 12      | 1.404                          | 1.197                           | Peroxioredoxin-2E-2, chloroplastic OS=Oryza sativa subsp. japonica GN=PRXIE-2 - [PRXIE2_ORYSJ]                                                        | cTP (plastid)                                                     |
| Q7XZW1                               | 4.04                                   | 1       | 1.866                          | <b>4.315</b>                    | 5.38                                       | 4       | 1.836                          | 1.267                           | NADH-ubiquinone oxidoreductase 23 kDa subunit, mitochondrial, putative, expressed OS=Oryza sativa subsp. japonica GN=OSJNB0094O03.18 - [Q7XZW1_ORYSJ] | mTP (mitochondrion)                                               |
| Q8H8D6                               | 3.13                                   | 1       | <b>3.239</b>                   | <b>2.758</b>                    | N. D                                       | N. D    | N. D                           | N. D                            | Glutathione S-transferase, N-terminal domain containing protein, expressed OS=Oryza sativa subsp. japonica GN=OJ1006F06.9 - [Q8H8D6_ORYSJ]            | SP (ER)                                                           |
| Q8RZT1                               | 2.42                                   | 1       | <b>0.447</b>                   | 1.147                           | 2.42                                       | 6       | 1.513                          | 0.998                           | Os01g0316100 protein OS=Oryza sativa subsp. japonica GN=B1012D10.43 - [Q8RZT1_ORYSJ]                                                                  | Putative L-pipecolic acid oxidase<br>unclear                      |
| Q9FE01                               | 38.25                                  | 9       | <b>2.589</b>                   | <b>3.760</b>                    | 40.64                                      | 56      | 1.562                          | 1.001                           | L-ascorbate peroxidase 2, cytosolic OS=Oryza sativa subsp. japonica GN=APX2 - [APX2_ORYSJ]                                                            | none (cytoplasm)                                                  |
| Q9FR35                               | 13.58                                  | 2       | 1.953                          | <b>2.011</b>                    | 51.23                                      | 28      | 1.389                          | 0.982                           | Peroxioredoxin-2C OS=Oryza sativa subsp. japonica GN=PRXIC - [PRXIC2_ORYSJ]                                                                           | none (cytoplasm)                                                  |
| <b>chaperone, heat shock protein</b> |                                        |         |                                |                                 |                                            |         |                                |                                 |                                                                                                                                                       |                                                                   |
| Q53NM9                               | 26.35                                  | 55      | 1.807                          | <b>2.385</b>                    | 55.62                                      | 251     | 1.705                          | 1.086                           | DnaK-type molecular chaperone hsp70- <i>rice</i> OS=Oryza sativa subsp. japonica GN=Os11g0703900 - [Q53NM9_ORYSJ]                                     | NTS (nucleus)                                                     |
| Q53RJ5                               | 4.19                                   | 11      | <b>0.299</b>                   | <b>0.410</b>                    | 7.62                                       | 34      | 0.755                          | N. D                            | DnaK protein OS=Oryza sativa subsp. japonica GN=Os03g0710500 - [Q53RJ5_ORYSJ]                                                                         | SP (secretory)                                                    |
| Q5VRY1-1                             | 17.47                                  | 4       | 1.772                          | <b>2.036</b>                    | 16.87                                      | 6       | 1.653                          | 0.836                           | Isoform 1 of 18.0 kDa class II heat shock protein OS=Oryza sativa subsp. japonica GN=HSP18.0 - [HSP18_ORYSJ]                                          | none (cytoplasm)                                                  |
| Q5Z9N8                               | 4.19                                   | 6       | <b>2.290</b>                   | <b>2.741</b>                    | 28.82                                      | 47      | 1.722                          | 0.832                           | Heat shock protein 90 OS=Oryza sativa subsp. japonica GN=P0481E08.35 - [Q5Z9N8_ORYSJ]                                                                 | SP (secretory)                                                    |
| Q69Y99                               | 23.41                                  | 6       | 0.997                          | <b>3.395</b>                    | 51.59                                      | 40      | 1.304                          | 1.019                           | Putative chaperonin 21 OS=Oryza sativa subsp. japonica GN=P0528E04.36-1 - [Q69Y99_ORYSJ]                                                              | cTP (plastid)                                                     |
| Q6K7E9                               | 7.56                                   | 3       | 0.984                          | <b>0.248</b>                    | 6.40                                       | 1       | 1.472                          | 1.324                           | 18.6 kDa class III heat shock protein OS=Oryza sativa subsp. japonica GN=HSP18.6 - [HS186_ORYSJ]                                                      | none (cytoplasm)                                                  |
| Q6Z7B0                               | 47.52                                  | 114     | <b>0.382</b>                   | 0.793                           | 52.78                                      | 316     | 1.389                          | 0.982                           | DnaK-type molecular chaperone Bip OS=Oryza sativa subsp. japonica GN=P0036E06.29 - [Q6Z7B0_ORYSJ]                                                     | SP (secretory)                                                    |
| Q6Z7L1                               | 17.23                                  | 16      | 1.647                          | <b>3.257</b>                    | 27.98                                      | 48      | 1.500                          | 1.084                           | Os02g0774300 protein OS=Oryza sativa subsp. japonica GN=OJ1448_G06.10 - [Q6Z7L1_ORYSJ]                                                                | Putative DnaK-type molecular chaperone<br>mTP (mitochondrion)     |
| Q6Z7V2                               | 22.73                                  | 6       | 1.602                          | <b>2.646</b>                    | 5.91                                       | 1       | 1.110                          | 0.695                           | 24.1 kDa heat shock protein, mitochondrial OS=Oryza sativa subsp. japonica GN=HSP24.1 - [HS24M_ORYSJ]                                                 | unclear                                                           |
| Q6ZCV7                               | 4.97                                   | 6       | 1.738                          | <b>2.107</b>                    | 21.15                                      | 40      | <b>4.469</b>                   | 1.093                           | Os08g0487800 protein OS=Oryza sativa subsp. japonica GN=P0028A08.21 - [Q6ZCV7_ORYSJ]                                                                  | Putative heat-shock protein<br>cTP (plastid)                      |
| Q75I57                               | 4.48                                   | 8       | 1.177                          | <b>2.021</b>                    | 14.67                                      | 17      | 1.437                          | 0.943                           | Putative heat shock protein, 5'-partial (Fragment) OS=Oryza sativa subsp. japonica GN=OSJNBa0083F15.25 - [Q75I57_ORYSJ]                               | unclear                                                           |
| Q8H3I7                               | 6.12                                   | 1       | 1.217                          | <b>2.194</b>                    | 16.33                                      | 13      | 1.176                          | 1.285                           | 10 kDa chaperonin OS=Oryza sativa subsp. japonica GN=P0524G08.116 - [Q8H3I7_ORYSJ]                                                                    | mTP (mitochondrion)                                               |
| Q8H903                               | 22.65                                  | 18      | 1.576                          | <b>2.021</b>                    | 41.29                                      | 69      | 1.512                          | 1.073                           | Mitochondrial chaperonin-60 OS=Oryza sativa subsp. japonica GN=OSJNBa0071K18.10 - [Q8H903_ORYSJ]                                                      | mTP (mitochondrion)                                               |
| Q943E6                               | 18.00                                  | 9       | 1.659                          | <b>0.243</b>                    | 12.00                                      | 1       | N. D                           | N. D                            | 16.9 kDa class I heat shock protein 2 OS=Oryza sativa subsp. japonica GN=HSP16.9B - [HS16B_ORYSJ]                                                     | none (cytoplasm)                                                  |
| Q9SLY8-1                             | 38.44                                  | 28      | <b>2.484</b>                   | <b>4.276</b>                    | 34.43                                      | 45      | 1.399                          | 0.954                           | Isoform 1 of Calreticulin OS=Oryza sativa subsp. japonica GN=Os07g0246200 - [CALR_ORYSJ]                                                              | SP (secretory)                                                    |
| <b>stress related</b>                |                                        |         |                                |                                 |                                            |         |                                |                                 |                                                                                                                                                       |                                                                   |
| Q04226                               | 2.37                                   | 2       | <b>2.945</b>                   | N. D                            | 6.42                                       | 6       | 1.574                          | 0.829                           | Delta-1-pyrroline-5-carboxylate synthase OS=Oryza sativa subsp. japonica GN=P5CS - [P5CS_ORYSJ]                                                       | none (cytoplasm)                                                  |
| Q0JMY8                               | 5.52                                   | 1       | <b>4.795</b>                   | <b>3.210</b>                    | 22.07                                      | 3       | 1.299                          | 0.689                           | Salt stress-induced protein OS=Oryza sativa subsp. japonica GN=SALT - [SALT_ORYSJ]                                                                    | none (cytoplasm)                                                  |
| Q67X37                               | 6.82                                   | 2       | 1.150                          | <b>2.329</b>                    | 10.71                                      | 2       | 1.473                          | 0.869                           | Os06g0231300 protein OS=Oryza sativa subsp. japonica GN=P0525F01.37 - [Q67X37_ORYSJ]                                                                  | Putative salt tolerance protein 5<br>cTP (plastid)                |
| Q6ESR4                               | 4.14                                   | 2       | 0.801                          | <b>2.244</b>                    | N. D                                       | N. D    | N. D                           | N. D                            | Dehydration-stress inducible protein 1 OS=Oryza sativa subsp. japonica GN=P0684A08.9-1 - [Q6ESR4_ORYSJ]                                               | NTS (nucleus)                                                     |
| Q6H660                               | 20.70                                  | 15      | 1.116                          | <b>2.128</b>                    | 36.16                                      | 46      | 1.202                          | 1.281                           | Os02g0644100 protein OS=Oryza sativa subsp. japonica GN=OJ1282_H11.17 - [Q6H660_ORYSJ]                                                                | Putative stress-induced protein s1<br>none (cytoplasm)            |
| Q6YUR8                               | 25.31                                  | 9       | 1.981                          | <b>4.368</b>                    | 29.05                                      | 10      | 1.127                          | 1.114                           | Cold shock domain protein 1 OS=Oryza sativa subsp. japonica GN=OSJNBb0088N06.21 - [Q6YUR8_ORYSJ]                                                      | none (cytoplasm)                                                  |
| Q6Z4N4                               | 9.80                                   | 1       | 1.966                          | <b>2.336</b>                    | 9.80                                       | 1       | 1.643                          | 1.262                           | Os07g0684000 protein OS=Oryza sativa subsp. japonica GN=OSJNBa0060017.15 - [Q6Z4N4_ORYSJ]                                                             | Ricin B-related lectin domain containing protein.<br>unclear      |
| Q6ZBK6                               | 1.99                                   | 1       | <b>0.256</b>                   | <b>0.279</b>                    | 3.10                                       | 2       | 1.812                          | 0.965                           | Os08g0519400 protein OS=Oryza sativa subsp. japonica GN=P0689E12.19 - [Q6ZBK6_ORYSJ]                                                                  | Putative stress related-like protein interactor<br>SP (secretory) |
| Q75LL0                               | 33.52                                  | 10      | <b>0.428</b>                   | <b>0.284</b>                    | 19.78                                      | 22      | 1.623                          | 1.423                           | Putative stress-related protein OS=Oryza sativa subsp. japonica GN=OSJNBa0047E24.27 - [Q75LL0_ORYSJ]                                                  | none (cytoplasm)                                                  |
| Q7XUY5                               | 74.52                                  | 83      | <b>2.059</b>                   | <b>3.846</b>                    | 79.62                                      | 148     | 1.295                          | 1.196                           | OSJNBb0048E02.12 protein OS=Oryza sativa subsp. japonica GN=OSJNBb0048E02.12 - [Q7XUY5_ORYSJ]                                                         | Pathogenesis-related protein<br>none (cytoplasm)                  |
| Q84UR8                               | 41.62                                  | 24      | 1.670                          | <b>3.357</b>                    | 48.73                                      | 16      | 0.765                          | 1.249                           | Cold shock domain protein 2 OS=Oryza sativa subsp. japonica GN=P0582D05.112 - [Q84UR8_ORYSJ]                                                          | none (cytoplasm)                                                  |

**Metabolism**

| Accession                          | hot      |         |                                |                                 | control  |         |                                |                                 | Description                                                                                                                                           | Sorting signal<br>(localization predicted) |
|------------------------------------|----------|---------|--------------------------------|---------------------------------|----------|---------|--------------------------------|---------------------------------|-------------------------------------------------------------------------------------------------------------------------------------------------------|--------------------------------------------|
|                                    | Coverage | Peptide | Ratio<br>(MSD1OE/WT for 4days) | Ratio<br>(MSD1OE/WT for 10days) | Coverage | Peptide | Ratio<br>(MSD1OE/WT for 4days) | Ratio<br>(MSD1OE/WT for 10days) |                                                                                                                                                       |                                            |
| <b>glycometabolism, glycolysis</b> |          |         |                                |                                 |          |         |                                |                                 |                                                                                                                                                       |                                            |
| P15280-2                           | 30.27    | 32      | <b>0.344</b>                   | 0.845                           | 48.85    | 98      | 1.356                          | 1.146                           | Isoform 2 of Glucose-1-phosphate adenylyltransferase small subunit, chloroplastic/amyloplastic OS=Oryza sativa subsp. japonica GN=AGPS - [GLGS_ORYSJ] | cTP (plastid)                              |
| P27934-2                           | 4.29     | 2       | <b>0.351</b>                   | <b>0.082</b>                    | N. D     | N. D    | N. D                           | N. D                            | Isoform 2 of Alpha-amylase isozyme 3E OS=Oryza sativa subsp. japonica GN=AMY1.4 - [AMY3E_ORYSJ]                                                       | SP (secretory)                             |
| P29421                             | 13.50    | 4       | <b>0.202</b>                   | <b>0.124</b>                    | 21.00    | 12      | 1.200                          | 1.185                           | Alpha-amylase/subtilisin inhibitor OS=Oryza sativa subsp. japonica GN=RASI - [IAAS_ORYSJ]                                                             | SP (secretory)                             |

|                                             |       |    |              |              |       |      |              |              |                                                                                                                                                                    |                                                                                                        |
|---------------------------------------------|-------|----|--------------|--------------|-------|------|--------------|--------------|--------------------------------------------------------------------------------------------------------------------------------------------------------------------|--------------------------------------------------------------------------------------------------------|
| P42863                                      | 1.59  | 1  | 0.953        | <b>2.316</b> | 14.64 | 9    | 1.753        | 0.725        | Glucose-6-phosphate isomerase, cytosolic B OS=Oryza sativa subsp. japonica GN=Os06g0256500 - [G6PIB_ORYSJ]                                                         | none (cytoplasm)                                                                                       |
| Q01401-1                                    | 23.66 | 31 | <b>0.114</b> | 0.685        | 28.66 | 84   | 1.272        | 0.659        | Isomern 1 of 1,4-alpha-glucan-branching enzyme, chloroplast/amyloplastic OS=Oryza sativa subsp. japonica GN=SBE1 - [GLGB_ORYSJ]                                    | cTP (plastid)                                                                                          |
| Q003D2                                      | 2.04  | 1  | 1.830        | <b>2.148</b> | 4.77  | 5    | 1.977        | 1.089        | Pyruvate decarboxylase isozyme 3 OS=Oryza sativa subsp. japonica GN=PDC3 - [PDC3_ORYSJ]                                                                            | none (cytoplasm)                                                                                       |
| Q0J8A4                                      | 33.23 | 34 | 1.686        | <b>2.210</b> | 59.35 | 164  | <b>2.061</b> | 0.899        | Glyceraldehyde-3-phosphate dehydrogenase, cytosolic OS=Oryza sativa subsp. japonica GN=GAPC - [G3PC_ORYSJ]                                                         | none (cytoplasm)                                                                                       |
| Q40677                                      | 16.49 | 9  | <b>2.461</b> | <b>2.338</b> | 29.64 | 41   | 1.846        | 1.175        | Fructose-bisphosphate aldolase, chloroplast OS=Oryza sativa subsp. japonica GN=Os11g0171300 - [ALFC_ORYSJ]                                                         | cTP (plastid)                                                                                          |
| Q5JK10                                      | 9.49  | 4  | <b>2.063</b> | 1.960        | 27.31 | 28   | 1.913        | 0.694        | Os01g026300 protein OS=Oryza sativa subsp. japonica GN=OSJNBa0093F16.14 - [Q5JK10_ORYSJ]                                                                           | Putative transaldolase<br>unclear                                                                      |
| Q5NBP9                                      | 1.30  | 1  | <b>2.594</b> | <b>4.614</b> | N. D  | N. D | N. D         | N. D         | Os01g0276800 protein OS=Oryza sativa subsp. japonica GN=P0038F12.26 - [Q5NBP9_ORYSJ]                                                                               | Protein kinase C substrate 80K-H isoform 2-like<br>SP (secretory)                                      |
| Q5VNT5                                      | 3.31  | 3  | <b>0.372</b> | 1.057        | 37.74 | 84   | 1.377        | 1.313        | Glucose-1-phosphate adenylyltransferase OS=Oryza sativa subsp. japonica GN=P0663E10.9 - [Q5VNT5_ORYSJ]                                                             | none (cytoplasm)                                                                                       |
| Q5VNW1                                      | 5.37  | 4  | <b>2.791</b> | 1.058        | 28.12 | 68   | 1.768        | 0.834        | Putative transketolase 1 OS=Oryza sativa subsp. japonica GN=P0001H02.3 - [Q5VNW1_ORYSJ]                                                                            | NTS (nucleus)                                                                                          |
| Q60EY9                                      | 3.92  | 3  | <b>2.036</b> | <b>2.178</b> | 25.16 | 15   | 1.936        | 0.666        | Os05g0208000 protein OS=Oryza sativa subsp. japonica GN=OJ1430_B02.7 - [Q60EY9_ORYSJ]                                                                              | Putative 2-oxoglutarate/malate translocator<br>mTP (mitochondrion)                                     |
| Q653V7                                      | 1.47  | 1  | <b>0.110</b> | N. D         | 13.56 | 19   | 1.463        | 1.382        | Probable alpha-glucosidase Os06g0675700 OS=Oryza sativa subsp. japonica GN=Os06g0675700 - [AGLU_ORYSJ]                                                             | SP (secretory)                                                                                         |
| Q69K00                                      | 8.88  | 4  | <b>3.120</b> | <b>2.710</b> | 25.00 | 18   | 1.557        | 1.044        | Triose phosphate isomerase OS=Oryza sativa subsp. japonica GN=P0569E11.2-1 - [Q69K00_ORYSJ]                                                                        | cTP (plastid)                                                                                          |
| Q6EN36                                      | 1.81  | 1  | <b>0.398</b> | <b>7.427</b> | N. D  | N. D | N. D         | N. D         | Os02g0256100 protein OS=Oryza sativa subsp. japonica GN=OSJNBa0052K15.27 - [Q6EN36_ORYSJ]                                                                          | Putative polygalacturonase<br>SP (secretory)                                                           |
| Q6EUF8                                      | 11.00 | 4  | 1.676        | <b>2.058</b> | 8.20  | 3    | 1.817        | <b>0.449</b> | Citrate synthase OS=Oryza sativa subsp. japonica GN=OJ1705_E12.26 - [Q6EUF8_ORYSJ]                                                                                 | unclear                                                                                                |
| Q6HP88                                      | 7.52  | 8  | 0.667        | <b>2.082</b> | 24.24 | 77   | 1.381        | 0.759        | Branching enzyme-3 OS=Oryza sativa subsp. japonica GN=P0475F05.16 - [Q6HP88_ORYSJ]                                                                                 | cTP (plastid)                                                                                          |
| Q6Z5N4                                      | 10.77 | 5  | 1.691        | <b>2.152</b> | 17.95 | 24   | 1.730        | 0.889        | Os02g0739600 protein OS=Oryza sativa subsp. japonica GN=P0684F11.25 - [Q6Z5N4_ORYSJ]                                                                               | Putative pyruvate dehydrogenase E1 alpha subunit<br>mTP (mitochondrion)                                |
| Q6Z9C3                                      | 7.65  | 4  | <b>0.500</b> | 1.047        | N. D  | N. D | N. D         | N. D         | Probable 6-phosphogluconolactonase 3, chloroplast OS=Oryza sativa subsp. japonica GN=Os08g0547100 - [P6GL3_ORYSJ]                                                  | cTP (plastid)                                                                                          |
| Q6ZBH2                                      | 12.47 | 16 | <b>0.237</b> | 0.583        | 27.10 | 67   | 1.357        | 1.248        | Os08g0545200 protein OS=Oryza sativa subsp. japonica GN=P0623F08.37 - [Q6ZBH2_ORYSJ]                                                                               | Putative sorbitol dehydrogenase<br>unclear                                                             |
| Q75K90                                      | 17.10 | 6  | <b>2.762</b> | 0.984        | 44.84 | 42   | 2.093        | 1.028        | Phosphoglycerate kinase OS=Oryza sativa subsp. japonica GN=OU1118_C04.1 - [Q75K90_ORYSJ]                                                                           | none (cytoplasm)                                                                                       |
| Q7FAH2                                      | 35.31 | 41 | <b>2.256</b> | <b>2.998</b> | 48.66 | 187  | 1.873        | 0.885        | Glyceraldehyde-3-phosphate dehydrogenase OS=Oryza sativa subsp. japonica GN=OJ0002Z3_09.15 - [Q7FAH2_ORYSJ]                                                        | unclear                                                                                                |
| Q7X8A1                                      | 7.46  | 3  | <b>3.835</b> | <b>2.516</b> | 28.61 | 42   | <b>2.024</b> | 0.910        | OSJNBa0036B21.24 protein OS=Oryza sativa subsp. japonica GN=OSJNBa0036B21.24 - [Q7X8A1_ORYSJ]                                                                      | glucose metabolic process related protein<br>cTP (plastid)                                             |
| Q8H3Q7                                      | 8.77  | 5  | <b>2.116</b> | <b>3.116</b> | 30.48 | 34   | <b>1.776</b> | 0.912        | Xylose isomerase OS=Oryza sativa subsp. japonica GN=P0625E02.119 - [Q8H3Q7_ORYSJ]                                                                                  | SP (secretory)                                                                                         |
| Q8H4V1                                      | 1.54  | 2  | <b>3.683</b> | 1.746        | 28.32 | 50   | 1.685        | 0.675        | Os08g0366000 protein OS=Oryza sativa subsp. japonica GN=OJ1484_G09.129-1 - [Q8H4V1_ORYSJ]                                                                          | Phosphoenolpyruvate carboxylase<br>unclear                                                             |
| Q94J00                                      | 6.95  | 2  | <b>2.877</b> | <b>2.770</b> | 9.02  | 8    | 1.961        | 0.885        | Fructose-bisphosphate aldolase OS=Oryza sativa subsp. japonica GN=P0494A10.15 - [Q94J00_ORYSJ]                                                                     | unclear                                                                                                |
| Q9AUQ4                                      | 22.68 | 27 | 1.095        | <b>2.004</b> | 44.85 | 105  | 1.665        | 0.935        | Phosphoglucomutase OS=Oryza sativa subsp. japonica GN=OSJNBa0033N16.5 - [Q9AUQ4_ORYSJ]                                                                             | PTS(peroxisome)                                                                                        |
| Q9FRX7                                      | 4.74  | 3  | <b>2.289</b> | 1.558        | 26.96 | 34   | 1.738        | 0.902        | Aldehyde dehydrogenase ALDH2b OS=Oryza sativa subsp. japonica GN=Alhd2b - [Q9FRX7_ORYSJ]                                                                           | mTP (mitochondrion)                                                                                    |
| Q9SNK3                                      | 14.41 | 7  | <b>2.494</b> | <b>2.030</b> | 30.63 | 44   | 1.868        | 1.063        | EST C74302(E03840) corresponds to a region of the predicted gene OS=Oryza sativa subsp. japonica GN=Os03g0129300 - [Q9SNK3_ORYSJ]                                  | Glyceraldehyde-3-phosphate dehydrogenase B,<br>cTP (plastid)                                           |
| <b>energy metabolism</b>                    |       |    |              |              |       |      |              |              |                                                                                                                                                                    |                                                                                                        |
| P0C522                                      | 9.63  | 6  | <b>2.664</b> | <b>4.095</b> | 46.56 | 132  | 1.804        | 0.860        | ATP synthase subunit alpha, mitochondrial OS=Oryza sativa subsp. japonica GN=ATPA - [ATPAM_ORYSJ]                                                                  | mitochondrial gene                                                                                     |
| P12085                                      | 14.26 | 22 | <b>2.083</b> | <b>2.056</b> | 65.46 | 178  | 1.850        | 1.082        | ATP synthase subunit beta, chloroplast OS=Oryza sativa subsp. japonica GN=atpB - [ATPB_ORYSJ]                                                                      | chloroplast gene                                                                                       |
| Q01859                                      | 46.74 | 63 | <b>2.046</b> | <b>2.436</b> | 56.70 | 212  | 1.586        | 1.190        | ATP synthase subunit beta, mitochondrial OS=Oryza sativa subsp. japonica GN=ATPB - [ATPB_ORYSJ]                                                                    | mTP (mitochondrion)                                                                                    |
| Q5TKF4                                      | 25.10 | 8  | <b>2.070</b> | <b>2.402</b> | 21.34 | 14   | 1.644        | 0.901        | Nucleoside diphosphate kinase OS=Oryza sativa subsp. japonica GN=OSJNBa003014.12 - [Q5TKF4_ORYSJ]                                                                  | cTP (plastid)                                                                                          |
| Q8S7T5                                      | 11.53 | 6  | <b>2.822</b> | <b>2.007</b> | N. D  | N. D | N. D         | N. D         | ATP synthase subunit alpha OS=Oryza sativa subsp. japonica GN=OSJNBa000514.21 - [Q8S7T5_ORYSJ]                                                                     | none (cytoplasm)                                                                                       |
| Q6K9N6                                      | 11.37 | 6  | 1.874        | <b>2.564</b> | 30.33 | 22   | 1.630        | 1.094        | Succinyl-CoA ligase [GDP-forming] subunit beta, mitochondrial OS=Oryza sativa subsp. japonica GN=Os02g0621700 - [SUCB_ORYSJ]                                       | mTP (mitochondrion)                                                                                    |
| <b>lipid metabolism</b>                     |       |    |              |              |       |      |              |              |                                                                                                                                                                    |                                                                                                        |
| Q10EK7                                      | 37.79 | 17 | <b>0.422</b> | <b>0.121</b> | 18.60 | 6    | 1.343        | 1.967        | Oleoin 18 kDa OS=Oryza sativa subsp. japonica GN=OLE18 - [OLEO2_ORYSJ]                                                                                             | unclear                                                                                                |
| Q42980                                      | 7.43  | 2  | 0.954        | <b>0.384</b> | 7.43  | 4    | 1.139        | 1.683        | Oleoin 16 kDa OS=Oryza sativa subsp. japonica GN=OLE16 - [OLEO1_ORYSJ]                                                                                             | unclear                                                                                                |
| Q6Y4Y7                                      | 2.73  | 2  | <b>3.489</b> | <b>4.656</b> | 1.34  | 1    | <b>2.004</b> | 1.091        | Os02g0588500 protein OS=Oryza sativa subsp. japonica GN=OSJNBa0046012.21 - [Q6Y4Y7_ORYSJ]                                                                          | Putative GPI-anchored protein<br>SP (plasma membrane)                                                  |
| Q6YZX6                                      | 4.90  | 4  | <b>3.413</b> | <b>3.178</b> | 23.39 | 73   | 1.623        | 0.983        | Putative aconitate hydratase, cytoplasmic OS=Oryza sativa subsp. japonica GN=Os08g0191100 - [ACOC_ORYSJ]                                                           | none (cytoplasm)                                                                                       |
| Q6Z0I4                                      | 21.33 | 9  | 1.210        | <b>2.222</b> | 14.93 | 7    | 1.795        | 0.981        | Os08g0327400 protein OS=Oryza sativa subsp. japonica GN=OSJNBa0049101.2 - [Q6Z0I4_ORYSJ]                                                                           | Putative enoyl-ACP reductase<br>cTP (plastid)                                                          |
| Q75GN2                                      | 10.14 | 1  | <b>0.213</b> | <b>0.224</b> | 10.14 | 2    | 1.505        | 1.543        | Non-specific lipid-transfer protein OS=Oryza sativa subsp. japonica GN=OSJNBa0018K15.7 - [Q75GN2_ORYSJ]                                                            | SP (secretory)                                                                                         |
| Q75LC6                                      | 2.72  | 3  | <b>5.639</b> | N. D         | 2.45  | 3    | 1.856        | 0.579        | GDSL-motif lipase/hydrolase family protein, putative, expressed OS=Oryza sativa subsp. japonica GN=OSJNBa0032G11.17 - [Q75LC6_ORYSJ]                               | SP (secretory)                                                                                         |
| Q7F280                                      | 2.67  | 1  | <b>4.106</b> | N. D         | 30.83 | 25   | 1.838        | 0.753        | Isocitrate dehydrogenase [NADP] OS=Oryza sativa subsp. japonica GN=OSJNBa0006H05.32 - [Q7F280_ORYSJ]                                                               | PTS(peroxisome)                                                                                        |
| Q850E1                                      | 3.41  | 3  | <b>2.049</b> | 0.951        | N. D  | N. D | N. D         | N. D         | Pyruvate kinase OS=Oryza sativa subsp. japonica GN=OJ1014_E09.29-2 - [Q850E1_ORYSJ]                                                                                | Mitochondrion                                                                                          |
| <b>nucleotide and amino acid metabolism</b> |       |    |              |              |       |      |              |              |                                                                                                                                                                    |                                                                                                        |
| P14656                                      | 3.09  | 1  | <b>2.847</b> | <b>3.028</b> | 29.21 | 19   | 1.549        | 0.998        | Glutamine synthetase cytosolic isozyme 1-1 OS=Oryza sativa subsp. japonica GN=GLN1-1 - [GLN11_ORYSJ]                                                               | PTS(peroxisome)                                                                                        |
| P37833                                      | 9.83  | 7  | <b>0.491</b> | 0.958        | 47.42 | 78   | 1.538        | 0.712        | Aspartate aminotransferase, cytoplasmic OS=Oryza sativa subsp. japonica GN=Os01g0780600 - [AATC_ORYSJ]                                                             | none (cytoplasm)                                                                                       |
| Q0DKY4                                      | 13.38 | 6  | <b>3.404</b> | <b>2.219</b> | 38.13 | 42   | 1.652        | 1.363        | S-adenosylmethionine synthase 1 OS=Oryza sativa subsp. japonica GN=SAM1 - [METK1_ORYSJ]                                                                            | none (cytoplasm)                                                                                       |
| Q6ATY5                                      | 8.84  | 1  | 1.595        | <b>2.468</b> | 9.52  | 5    | 1.685        | 1.188        | Putative N'-5'-phosphoribosyl-formimino-5-aminimidazole-4-carboxamide ribonucleotide isomerase OS=Oryza sativa subsp. japonica GN=OSJNBa0035J16.8 - [Q6ATY5_ORYSJ] | none (cytoplasm)                                                                                       |
| Q6K1R5                                      | 10.56 | 2  | 1.846        | <b>2.459</b> | 39.30 | 55   | 1.785        | 0.944        | Putative adenosine kinase OS=Oryza sativa subsp. japonica GN=B1215B07.34 - [Q6K1R5_ORYSJ]                                                                          | SP (ER)                                                                                                |
| Q7F1F2                                      | 6.38  | 5  | 1.855        | <b>2.350</b> | 16.90 | 18   | 1.524        | 1.099        | Os08g0525600 protein OS=Oryza sativa subsp. japonica GN=OJ1191_A10.119 - [Q7F1F2_ORYSJ]                                                                            | Putative 70 kDa peptidyl-prolyl isomerase<br>none (cytoplasm)                                          |
| Q94HC5                                      | 10.54 | 13 | <b>0.425</b> | 0.998        | 43.60 | 105  | 1.329        | 0.998        | Putative alanine aminotransferase OS=Oryza sativa subsp. japonica GN=OSJNBa00611H8.10 - [Q94HC5_ORYSJ]                                                             | none (cytoplasm)                                                                                       |
| <b>secondary metabolite</b>                 |       |    |              |              |       |      |              |              |                                                                                                                                                                    |                                                                                                        |
| Q5VR12                                      | 3.54  | 1  | <b>2.328</b> | <b>3.321</b> | 17.04 | 6    | 1.704        | 0.986        | Os01g0174300 protein OS=Oryza sativa subsp. japonica GN=OSJNBa0089K24.21 - [Q5VR12_ORYSJ]                                                                          | Flavoprotein pyridine nucleotide cytochrome reductase domain containing protein<br>mTP (mitochondrion) |
| Q6ATP8                                      | 8.06  | 2  | <b>8.291</b> | <b>6.456</b> | N. D  | N. D | N. D         | N. D         | Dirigent-like protein, expressed OS=Oryza sativa subsp. japonica GN=OSJNBa0028F23.22 - [Q6ATP8_ORYSJ]                                                              | SP (secretory)                                                                                         |
| Q6Z6B5                                      | 3.48  | 1  | <b>3.216</b> | <b>4.937</b> | 11.50 | 6    | 1.693        | 0.973        | Os02g0328300 protein OS=Oryza sativa subsp. japonica GN=P0622F08.20 - [Q6Z6B5_ORYSJ]                                                                               | Phenol hydroxylase reductase family protein<br>cTP (plastid)                                           |
| Q6Z8I7                                      | 4.49  | 2  | <b>8.293</b> | N. D         | 21.03 | 24   | 1.823        | 0.801        | Os02g0752200 protein OS=Oryza sativa subsp. japonica GN=P0431B06.43 - [Q6Z8I7_ORYSJ]                                                                               | Similar to Beta-D-xylosidase<br>SP (plasma membrane)                                                   |
| Q8W3D0                                      | 4.47  | 2  | <b>2.087</b> | <b>2.404</b> | N. D  | N. D | N. D         | N. D         | Probable pyridoxal biosynthesis protein PDX1.2 OS=Oryza sativa subsp. japonica GN=PDX1.2 - [PDX12_ORYSJ]                                                           | none (cytoplasm)                                                                                       |
| <b>photosynthesis</b>                       |       |    |              |              |       |      |              |              |                                                                                                                                                                    |                                                                                                        |
| P0C358                                      | 1.63  | 8  | <b>4.091</b> | 1.941        | 15.94 | 34   | 1.689        | 0.882        | Photosystem I P700 chlorophyll a apoprotein A2 OS=Oryza sativa subsp. japonica GN=psaB - [PSAB_ORYSJ]                                                              | chloroplast gene                                                                                       |

| Accession | Coverage | Peptide | hot Ratio    | hot Ratio (MSD1OE/WT for 10days) | control Coverage | control Peptide | control Ratio | control Ratio (MSD1OE/WT for 10days) | Description                                                                                                                                                  | Sorting signal (localization predicted)                    |
|-----------|----------|---------|--------------|----------------------------------|------------------|-----------------|---------------|--------------------------------------|--------------------------------------------------------------------------------------------------------------------------------------------------------------|------------------------------------------------------------|
| P0C367    | 11.63    | 7       | <b>3.297</b> | 1.696                            | 24.52            | 39              | 1.953         | 0.972                                | Photosystem II CP43 chlorophyll apoprotein OS=Oryza sativa subsp. japonica GN=psbC - [PSBC_ORYSJ]                                                            | chloroplatic gene                                          |
| P0C434    | 6.80     | 4       | <b>4.686</b> | <b>2.025</b>                     | 20.96            | 47              | 1.728         | 1.082                                | Photosystem Q(B) protein OS=Oryza sativa subsp. japonica GN=psbA - [PSBA_ORYSJ]                                                                              | chloroplatic gene                                          |
| P0C512    | 19.92    | 46      | <b>2.653</b> | 1.308                            | 37.32            | 232             | 1.739         | 0.722                                | Ribulose biphosphate carboxylase large chain OS=Oryza sativa subsp. japonica GN=rbcL - [RBL_ORYSJ]                                                           | chloroplatic gene                                          |
| P93431-2  | 7.16     | 3       | <b>3.430</b> | 1.518                            | 51.96            | 114             | 1.763         | 0.973                                | Isoform 2 of Ribulose biphosphate carboxylase/oxygenase activase, chloroplatic OS=Oryza sativa subsp. japonica GN=RCA - [RCA_ORYSJ]                          | cTP (plastid)                                              |
| Q0DFC9    | 5.19     | 2       | <b>2.396</b> | 1.950                            | 20.78            | 8               | 0.751         | 1.652                                | Plastocyanin, chloroplatic OS=Oryza sativa subsp. japonica GN=PETE - [PLAS_ORYSJ]                                                                            | cTP (plastid)                                              |
| Q10HD0    | 24.71    | 8       | <b>2.799</b> | 1.653                            | 24.71            | 49              | 1.760         | 0.906                                | Chlorophyll a-b binding protein, chloroplatic OS=Oryza sativa subsp. japonica GN=RCABP89 - [CB23_ORYSJ]                                                      | cTP (plastid)                                              |
| Q6AVA8-2  | 20.63    | 61      | <b>0.312</b> | 1.373                            | 52.83            | 274             | 1.208         | 1.143                                | Isoform 2 of Pyruvate, phosphate dikinase 1, chloroplatic OS=Oryza sativa subsp. japonica GN=PPDK1 - [PPDK1_ORYSJ]                                           | cTP (plastid)                                              |
| Q6Z411    | 4.83     | 3       | <b>2.297</b> | 1.547                            | 20.34            | 50              | 1.937         | 0.892                                | Chlorophyll a-b-binding protein OS=Oryza sativa subsp. japonica GN=P0567H04.14 - [Q6Z411_ORYSJ]                                                              | cTP (plastid)                                              |
| Q6ZF30    | 6.77     | 3       | <b>3.005</b> | <b>2.689</b>                     | 17.67            | 22              | <b>2.040</b>  | 0.889                                | Os07g0562700 protein OS=Oryza sativa subsp. japonica GN=P0406F06.32 - [Q6ZF30_ORYSJ]                                                                         | Putative chlorophyll A-B binding protein of LHClI type III |
| Q6ZJF9    | 11.04    | 29      | 1.584        | <b>6.632</b>                     | 27.09            | 58              | 1.718         | 1.313                                | Os02g0102900 protein OS=Oryza sativa subsp. japonica GN=OJ1435_F07.26 - [Q6ZJF9_ORYSJ]                                                                       | 60 kDa chaperonin beta subunit                             |
| Q7X9A7    | 11.82    | 16      | <b>2.208</b> | <b>2.875</b>                     | 57.02            | 115             | 1.396         | 1.130                                | Putative Rubisco subunit binding-protein alpha subunit (60 kDa chaperonin alpha subunit) OS=Oryza sativa subsp. japonica GN=OSJNBa0033P04.2 - [Q7X9A7_ORYSJ] | cTP (plastid)                                              |
| Q7XM78    | 5.84     | 2       | <b>3.704</b> | <b>2.649</b>                     | 55.84            | 45              | 1.983         | 0.957                                | OSJNBa0079C19.2 protein OS=Oryza sativa GN=OSJNBa0079C19.2 - [Q7XM78_ORYSJ]                                                                                  | SP (plasma membrane)                                       |
| Q84PB4    | 18.72    | 3       | 1.758        | <b>2.215</b>                     | 44.33            | 23              | 1.563         | 0.991                                | Chloroplast photosystem I reaction center subunit II-like protein OS=Oryza sativa subsp. japonica GN=Os08g0560900 - [Q84PB4_ORYSJ]                           | cTP (plastid)                                              |
| Q8GTK4    | 20.47    | 13      | <b>2.845</b> | <b>2.449</b>                     | 46.46            | 48              | 1.576         | 0.988                                | Os07g0141400 protein OS=Oryza sativa subsp. japonica GN=OJ1351_C05.112 - [Q8GTK4_ORYSJ]                                                                      | Probable photosystem II oxygen-evolving complex protein 2  |
| Q857H8    | 4.24     | 1       | <b>3.191</b> | 1.671                            | 22.46            | 12              | 1.751         | 1.129                                | Photosystem I reaction center subunit III, chloroplast, putative, expressed OS=Oryza sativa subsp. japonica GN=OSJNBa0010I09.4 - [Q857H8_ORYSJ]              | cTP (plastid)                                              |
| Q943W1    | 23.72    | 20      | <b>2.884</b> | <b>2.384</b>                     | 43.54            | 99              | 1.467         | 1.227                                | Os1g0501800 protein OS=Oryza sativa subsp. japonica GN=B1080D07.27 - [Q943W1_ORYSJ]                                                                          | Putative 33kDa oxygen evolving protein of photosystem II   |
| Q9LWT6    | 29.95    | 49      | 1.537        | <b>2.685</b>                     | 50.92            | 121             | 1.415         | 1.135                                | Os06g0114000 protein OS=Oryza sativa subsp. japonica GN=P0541H01.20 - [Q9LWT6_ORYSJ]                                                                         | Rubisco subunit binding-protein beta subunit               |

### Storage protein

| Accession | Coverage | Peptide | hot Ratio    | hot Ratio (MSD1OE/WT for 10days) | control Coverage | control Peptide | control Ratio | control Ratio (MSD1OE/WT for 10days) | Description                                                                              | Sorting signal (localization predicted) |
|-----------|----------|---------|--------------|----------------------------------|------------------|-----------------|---------------|--------------------------------------|------------------------------------------------------------------------------------------|-----------------------------------------|
| P07728    | 37.47    | 384     | <b>0.196</b> | <b>0.197</b>                     | 41.68            | 439             | 1.305         | 0.887                                | Glutelin type-A 1 OS=Oryza sativa subsp. japonica GN=GLUA1 - [GLUA1_ORYSJ]               | SP (protein body)                       |
| P07730    | 34.87    | 330     | <b>0.423</b> | 0.882                            | 43.29            | 383             | 1.255         | 0.527                                | Glutelin type-A 2 OS=Oryza sativa subsp. japonica GN=GLUA2 - [GLUA2_ORYSJ]               | SP (protein body)                       |
| P14323    | 46.09    | 351     | <b>0.079</b> | <b>0.271</b>                     | 41.28            | 566             | 1.215         | 1.160                                | Glutelin type-B 1 OS=Oryza sativa subsp. japonica GN=GLUB1 - [GLUB1_ORYSJ]               | SP (protein body)                       |
| P14614    | 56.60    | 356     | <b>0.088</b> | <b>0.137</b>                     | 46.80            | 459             | 0.950         | 0.893                                | Glutelin type-B 4 OS=Oryza sativa subsp. japonica GN=GLUB4 - [GLUB4_ORYSJ]               | SP (protein body)                       |
| Q02897    | 46.87    | 335     | <b>0.023</b> | <b>0.285</b>                     | 37.78            | 484             | 1.221         | 0.893                                | Glutelin type-B 2 OS=Oryza sativa subsp. japonica GN=GLUB2 - [GLUB2_ORYSJ]               | SP (protein body)                       |
| Q09151    | 34.48    | 255     | <b>0.193</b> | <b>0.174</b>                     | 41.53            | 333             | 1.055         | 0.577                                | Glutelin type-A 3 OS=Oryza sativa subsp. japonica GN=GLUA3 - [GLUA3_ORYSJ]               | SP (protein body)                       |
| Q42465    | 33.77    | 82      | 0.904        | <b>0.280</b>                     | 33.77            | 50              | <b>0.479</b>  | 0.597                                | Prolamin PPROL 14P OS=Oryza sativa subsp. japonica GN=PROML20 - [PRO20_ORYSJ]            | SP (protein body)                       |
| Q5W695    | 39.19    | 56      | N. D.        | <b>0.019</b>                     | N. D.            | N. D.           | N. D.         | N. D.                                | Putative prolamin 7 OS=Oryza sativa subsp. japonica GN=OSJNBa0051L16.21 - [Q5W695_ORYSJ] | SP (protein body)                       |
| Q5W6A3    | 38.67    | 39      | N. D.        | <b>0.033</b>                     | 48.67            | 75              | 0.762         | <b>0.273</b>                         | Prolamin OS=Oryza sativa subsp. japonica GN=OSJNBa0051L16.13 - [Q5W6A3_ORYSJ]            | SP (protein body)                       |
| Q5W6A5    | 18.11    | 10      | <b>0.245</b> | <b>0.148</b>                     | N. D.            | N. D.           | N. D.         | N. D.                                | Putative prolamin 7 OS=Oryza sativa subsp. japonica GN=OSJNBa0051L16.9 - [Q5W6A5_ORYSJ]  | unclear                                 |
| Q65XA1    | 13.93    | 4       | <b>2.029</b> | 1.591                            | 27.88            | 50              | 1.689         | 0.986                                | Os05g0116000 protein OS=Oryza sativa subsp. japonica GN=OJ1654_B10.17 - [Q65XA1_ORYSJ]   | Putative legumin                        |
| Q6ESW6    | 26.65    | 197     | <b>0.149</b> | 0.708                            | 35.47            | 243             | 1.056         | 0.547                                | Glutelin OS=Oryza sativa subsp. japonica GN=P0503B05.14 - [Q6ESW6_ORYSJ]                 | SP (protein body)                       |
| Q6K508    | 25.21    | 203     | <b>0.121</b> | <b>0.235</b>                     | 32.44            | 205             | 1.313         | 1.032                                | Glutelin OS=Oryza sativa subsp. japonica GN=OSJNBa0011N12.22 - [Q6K508_ORYSJ]            | SP (protein body)                       |
| Q6K7K6    | 43.33    | 110     | <b>0.170</b> | <b>0.349</b>                     | 46.27            | 275             | 1.238         | 1.068                                | Glutelin OS=Oryza sativa subsp. japonica GN=P0533E11.34-1 - [Q6K7K6_ORYSJ]               | SP (protein body)                       |
| Q8GVK5    | 80.79    | 79      | <b>0.479</b> | N. D.                            | N. D.            | N. D.           | N. D.         | N. D.                                | 13 kDa prolamin OS=Oryza sativa subsp. japonica GN=OSJNBa0031C24.138 - [Q8GVK5_ORYSJ]    | SP (protein body)                       |
| Q8GVK7    | 80.79    | 79      | <b>0.498</b> | N. D.                            | 58.94            | 33              | N. D.         | 0.583                                | 13 kDa prolamin OS=Oryza sativa subsp. japonica GN=OSJNBa0031C24.134 - [Q8GVK7_ORYSJ]    | SP (protein body)                       |
| Q850E1    | 3.41     | 3       | <b>0.086</b> | <b>0.077</b>                     | N. D.            | N. D.           | N. D.         | N. D.                                | Os1g0898500 protein OS=Oryza sativa subsp. japonica GN=P0506A10.18 - [Q850E1_ORYSJ]      | Putative patatin-like protein           |

### Functional protein expression

| Accession              | Coverage | Peptide | hot Ratio    | hot Ratio (MSD1OE/WT for 10days) | control Coverage | control Peptide | control Ratio | control Ratio (MSD1OE/WT for 10days) | Description                                                                                            | Sorting signal (localization predicted)           |
|------------------------|----------|---------|--------------|----------------------------------|------------------|-----------------|---------------|--------------------------------------|--------------------------------------------------------------------------------------------------------|---------------------------------------------------|
| <b>proteolysis</b>     |          |         |              |                                  |                  |                 |               |                                      |                                                                                                        |                                                   |
| P52428                 | 2.59     | 1       | <b>2.018</b> | 1.828                            | 22.96            | 10              | <b>2.025</b>  | 1.016                                | Proteasome subunit alpha type-1 OS=Oryza sativa subsp. japonica GN=PAF1 - [PSA1_ORYSJ]                 | none (cytoplasm)                                  |
| Q5SMV5                 | 3.10     | 2       | 1.719        | <b>2.038</b>                     | N. D.            | N. D.           | N. D.         | N. D.                                | Os06g0186400 protein OS=Oryza sativa subsp. japonica GN=P0470C02.1 - [Q5SMV5_ORYSJ]                    | Similar to Serine carboxypeptidase II-2 precursor |
| Q5SNJ4                 | 1.58     | 3       | 1.536        | <b>2.507</b>                     | 7.52             | 6               | 1.954         | 0.960                                | Os01g0191500 protein OS=Oryza sativa subsp. japonica GN=P0710E05.34 - [Q5SNJ4_ORYSJ]                   | Putative mitochondrial processing peptidase       |
| Q5VMN4                 | 3.25     | 1       | <b>2.547</b> | <b>2.719</b>                     | 17.33            | 8               | 1.767         | 1.033                                | Proteasome subunit beta type OS=Oryza sativa subsp. japonica GN=OSJNBa0085L11.4 - [Q5VMN4_ORYSJ]       | unclear                                           |
| Q5VPP1                 | 4.47     | 2       | <b>2.269</b> | <b>2.544</b>                     | N. D.            | N. D.           | N. D.         | N. D.                                | Proteasome subunit beta type OS=Oryza sativa subsp. japonica GN=OSJNBa0041F13.35 - [Q5VPP1_ORYSJ]      | none (cytoplasm)                                  |
| Q5ZAM8                 | 4.06     | 5       | <b>0.482</b> | 0.914                            | 2.13             | 2               | 1.635         | 0.511                                | Os01g0767100 protein OS=Oryza sativa subsp. japonica GN=OSJNBb0053G03.16 - [Q5ZAM8_ORYSJ]              | Putative prolyl carboxypeptidase, isoform 1       |
| Q6H852                 | 5.96     | 1       | 1.581        | <b>2.804</b>                     | N. D.            | N. D.           | N. D.         | N. D.                                | Proteasome subunit alpha type OS=Oryza sativa subsp. japonica GN=OJ1626_B09.4 - [Q6H852_ORYSJ]         | none (cytoplasm)                                  |
| Q6K669                 | 4.01     | 3       | <b>2.337</b> | 0.911                            | 34.28            | 36              | 1.702         | 1.238                                | Leucine aminopeptidase 2, chloroplatic OS=Oryza sativa subsp. japonica GN=Os02g0794700 - [AMPL2_ORYSJ] | cTP (plastid)                                     |
| Q6Y700                 | 4.42     | 1       | <b>2.443</b> | <b>2.637</b>                     | 25.70            | 15              | 1.992         | 1.033                                | Proteasome subunit alpha type-7-A OS=Oryza sativa subsp. japonica GN=Os08g0548900 - [PSA7A_ORYSJ]      | none (cytoplasm)                                  |
| Q6Z6L4                 | 3.76     | 4       | <b>3.861</b> | N. D.                            | 15.38            | 18              | 1.501         | 0.716                                | Os02g0218200 protein OS=Oryza sativa subsp. japonica GN=P0027A02.7 - [Q6Z6L4_ORYSJ]                    | Putative aminopeptidase M                         |
| Q6ZL89                 | 5.19     | 3       | <b>4.527</b> | <b>2.499</b>                     | 14.29            | 31              | 1.445         | 0.767                                | Os07g0578300 protein OS=Oryza sativa subsp. japonica GN=OJ1065_B06.27 - [Q6ZL89_ORYSJ]                 | Putative subtilisin-like serine protease          |
| Q8H5C3                 | 7.32     | 1       | 1.857        | <b>3.573</b>                     | 7.32             | 2               | 1.083         | 1.688                                | Putative Skp1 OS=Oryza sativa subsp. japonica GN=OJ1343_B12.137 - [Q8H5C3_ORYSJ]                       | none (cytoplasm)                                  |
| Q8RZW7                 | 4.36     | 3       | 1.661        | <b>6.911</b>                     | 27.39            | 35              | 1.783         | 0.875                                | Os1g0916400 protein OS=Oryza sativa subsp. japonica GN=P0413C03.8 - [Q8RZW7_ORYSJ]                     | Putative selenium binding protein                 |
| Q9LST6                 | 5.19     | 1       | 1.527        | <b>2.112</b>                     | 33.49            | 9               | 1.965         | 0.806                                | Proteasome subunit beta type-2 OS=Oryza sativa subsp. japonica GN=PBD1 - [PSB2_ORYSJ]                  | unclear                                           |
| Q9LSU3                 | 4.07     | 1       | <b>2.710</b> | 1.522                            | 24.80            | 21              | 1.750         | 0.929                                | Proteasome subunit alpha type-6 OS=Oryza sativa subsp. japonica GN=PA11 - [PSA6_ORYSJ]                 | none (cytoplasm)                                  |
| <b>protein folding</b> |          |         |              |                                  |                  |                 |               |                                      |                                                                                                        |                                                   |
| Q53LQ0                 | 61.72    | 94      | <b>0.494</b> | 1.022                            | 60.94            | 279             | 1.162         | 1.005                                | Protein disulfide isomerase-like 1-1 OS=Oryza sativa subsp. japonica GN=PDIL1-1 - [PD11_ORYSJ]         | SP (ER)                                           |
| Q5N801                 | 17.09    | 3       | 1.339        | <b>3.919</b>                     | 17.09            | 4               | 1.252         | 1.238                                | Os1g0915800 protein OS=Oryza sativa subsp. japonica GN=P0004D12.26 - [Q5N801_ORYSJ]                    | Putative immunophilin                             |

|                        |       |     |              |              |       |      |              |       |                                                                                                                           |                                                                                  |
|------------------------|-------|-----|--------------|--------------|-------|------|--------------|-------|---------------------------------------------------------------------------------------------------------------------------|----------------------------------------------------------------------------------|
| Q5Z9H9                 | 28.18 | 17  | 0.912        | <b>2.114</b> | 39.55 | 24   | 1.545        | 0.969 | Peptidyl-prolyl cis-trans isomerase OS=Oryza sativa subsp. japonica GN=P0655A07.5-1 - [Q5Z9H9_ORYSJ]                      | mTP (mitochondrion)                                                              |
| Q6S3F6                 | 1.61  | 1   | <b>2.297</b> | 1.167        | 6.43  | 7    | 1.543        | 0.905 | Putative t-complex protein 1 theta chain OS=Oryza sativa subsp. japonica GN=P0623A10.31 - [Q6S3F6_ORYSJ]                  | none (cytoplasm)                                                                 |
| Q67IX6                 | 29.13 | 36  | <b>0.299</b> | 0.755        | 40.50 | 92   | 1.217        | 1.195 | Protein disulfide isomerase-like 1-4 OS=Oryza sativa subsp. japonica GN=PDIL1.4 - [PDIL1_ORYSJ]                           | SP (ER)                                                                          |
| Q6ZHQ8                 | 26.74 | 11  | 1.898        | <b>2.201</b> | 22.09 | 66   | 1.544        | 1.001 | Peptidyl-prolyl cis-trans isomerase OS=Oryza sativa subsp. japonica GN=OJ1020_C02.14 - [Q6ZHQ8_ORYSJ]                     | PTS(peroxisome)                                                                  |
| Q75M08-1               | 19.40 | 13  | 1.971        | <b>2.714</b> | 37.70 | 36   | 1.571        | 1.012 | Isomorph 1 of Protein disulfide isomerase-like 2-1 OS=Oryza sativa subsp. japonica GN=PDIL2-1 - [PDIL2_ORYSJ]             | SP (secretory)                                                                   |
| Q75M32                 | 15.60 | 6   | <b>2.106</b> | 1.983        | 32.40 | 30   | 1.469        | 1.057 | Peptidyl-prolyl cis-trans isomerase OS=Oryza sativa subsp. japonica GN=P0668H12.6 - [Q75M32_ORYSJ]                        | unclear                                                                          |
| <b>phosphorylation</b> |       |     |              |              |       |      |              |       |                                                                                                                           |                                                                                  |
| P48489                 | 3.11  | 1   | <b>3.895</b> | N.D.         | N.D.  | N.D. | N.D.         | N.D.  | Serine/threonine-protein phosphatase PP1 OS=Oryza sativa subsp. japonica GN=Os03g0268000 - [PP1_ORYSJ]                    | none (cytoplasm)                                                                 |
| Q06967                 | 14.23 | 15  | <b>2.080</b> | <b>2.724</b> | 62.31 | 99   | 1.878        | 0.820 | 14-3-3-like protein GF14.F OS=Oryza sativa subsp. japonica GN=GF14.F - [14336_ORYSJ]                                      | none (cytoplasm)                                                                 |
| Q69QZ0                 | 3.39  | 1   | <b>0.141</b> | <b>0.207</b> | 7.34  | 3    | 1.037        | 1.500 | Probable protein phosphatase 2C 27 OS=Oryza sativa subsp. japonica GN=Os02g0799000 - [P2C27_ORYSJ]                        | none (cytoplasm)                                                                 |
| Q6H3Z1                 | 1.51  | 2   | 1.148        | <b>0.338</b> | N.D.  | N.D. | N.D.         | N.D.  | Os02g0650500 protein OS=Oryza sativa subsp. japonica GN=OSJNB0012J10.12 - [Q6H3Z1_ORYSJ]                                  | unclear                                                                          |
| Q6ZGJ8                 | 15.36 | 4   | <b>2.136</b> | <b>3.862</b> | 27.27 | 19   | 1.447        | 1.117 | Putative inorganic pyrophosphatase OS=Oryza sativa subsp. japonica GN=OJ1767_D02.15-2 - [Q6ZGJ8_ORYSJ]                    | mTP (mitochondrion)                                                              |
| Q7XTT9                 | 0.71  | 1   | <b>0.384</b> | <b>0.084</b> | N.D.  | N.D. | N.D.         | N.D.  | OSJNBa0058K23.13 protein OS=Oryza sativa subsp. japonica GN=OSJNBa0058K23.13 - [Q7XTT9_ORYSJ]                             | Belongs to the protein kinase superfamily                                        |
| <b>enzyme</b>          |       |     |              |              |       |      |              |       |                                                                                                                           |                                                                                  |
| Q60EJ3                 | 12.68 | 2   | <b>2.478</b> | N.D.         | 22.44 | 18   | <b>2.047</b> | 1.501 | putative 1,4-benzoquinone reductase OS=Oryza sativa subsp. japonica GN=OSJNBa0017K09.5 - [Q60EJ3_ORYSJ]                   | unclear                                                                          |
| Q69QR4                 | 16.67 | 2   | <b>2.170</b> | N.D.         | 21.32 | 9    | 1.978        | 0.931 | Os09g0481400 protein OS=Oryza sativa subsp. japonica GN=P0463D04.22 - [Q69QR4_ORYSJ]                                      | none (cytoplasm)                                                                 |
| Q6L4R5                 | 7.43  | 3   | <b>4.280</b> | <b>3.042</b> | 24.14 | 13   | 1.712        | 0.861 | Os05g0593100 protein OS=Oryza sativa subsp. japonica GN=P0663C08.13 - [Q6L4R5_ORYSJ]                                      | Putative vacuolar ATP synthase subunit C                                         |
| Q84R32                 | 19.02 | 5   | 1.926        | <b>2.422</b> | 29.27 | 11   | 1.576        | 1.193 | CBS domain containing protein, expressed OS=Oryza sativa subsp. japonica GN=OSJNB0016H12.19 - [Q84R32_ORYSJ]              | ctP (plastid)                                                                    |
| Q8GRU7                 | 1.96  | 1   | <b>2.749</b> | <b>8.813</b> | 1.96  | 1    | 1.468        | N.D.  | Os07g0640200 protein OS=Oryza sativa subsp. japonica GN=P0524G08.102 - [Q8GRU7_ORYSJ]                                     | none (cytoplasm)                                                                 |
| Q8GTK7                 | 9.76  | 6   | 1.730        | <b>2.527</b> | 9.76  | 9    | 1.322        | 1.074 | Os07g0495200 protein OS=Oryza sativa subsp. japonica GN=OJ1457_D07.102 - [Q8GTK7_ORYSJ]                                   | Putative ATP synthase delta' chain, mitochondrial                                |
| Q8LQ55                 | 15.30 | 4   | <b>2.182</b> | 1.687        | 9.81  | 10   | 1.503        | 1.048 | Carboxymethylerythrolidase-like protein OS=Oryza sativa subsp. japonica GN=P0702H08.32 - [Q8LQ55_ORYSJ]                   | Putative beta-D-xylosidase                                                       |
| <b>others</b>          |       |     |              |              |       |      |              |       |                                                                                                                           |                                                                                  |
| Q0JR25                 | 6.69  | 3   | 1.494        | <b>0.279</b> | N.D.  | N.D. | N.D.         | N.D.  | Bowman-Birk type bran trypsin inhibitor OS=Oryza sativa subsp. japonica GN=RBB3.3 - [BBR_ORYSJ]                           | SP (secretory)                                                                   |
| Q5TKJ2                 | 1.20  | 1   | 1.346        | <b>2.269</b> | 20.85 | 17   | 1.706        | 0.802 | Os05g0429400 protein OS=Oryza sativa subsp. japonica GN=OSJNB0048I21.5 - [Q5TKJ2_ORYSJ]                                   | Phosphatidylinositol transfer protein-like, N-terminal domain containing protein |
| Q67VZ1                 | 3.15  | 1   | <b>2.114</b> | 1.310        | 34.07 | 26   | 1.696        | 0.892 | Os06g0221200 protein OS=Oryza sativa subsp. japonica GN=P0516A04.15 - [Q67VZ1_ORYSJ]                                      | Putative annexin                                                                 |
| Q6YUA1                 | 12.75 | 6   | 1.272        | <b>2.793</b> | 19.61 | 19   | 1.224        | 1.006 | Os02g0100300 protein OS=Oryza sativa subsp. japonica GN=B1370C05.2 - [Q6YUA1_ORYSJ]                                       | Putative tetrapeptide repeat (TPR)-containing protein                            |
| Q6Z8S1                 | 6.29  | 2   | 1.176        | <b>2.370</b> | 7.43  | 2    | 1.870        | 1.062 | Os08g0442300 protein OS=Oryza sativa subsp. japonica GN=P0708B04.3-1 - [Q6Z8S1_ORYSJ]                                     | Putative Calcineurin B subunit                                                   |
| Q75GX9                 | 42.70 | 113 | 1.257        | <b>0.345</b> | 32.92 | 82   | 1.416        | 0.995 | Cupin family protein, expressed OS=Oryza sativa subsp. japonica GN=OSJNBa0034D21.12 - [Q75GX9_ORYSJ]                      | SP (secretory)                                                                   |
| Q7G8G4                 | 0.86  | 1   | 1.463        | <b>2.716</b> | N.D.  | N.D. | N.D.         | N.D.  | NB-ARC domain containing protein, expressed OS=Oryza sativa subsp. japonica GN=OSJNBa0020E23.2 - [Q7G8G4_ORYSJ]           | unclear                                                                          |
| Q84VG0                 | 36.49 | 15  | 1.569        | <b>3.154</b> | 70.27 | 31   | 1.183        | 1.159 | Probable calcium-binding protein CML7 OS=Oryza sativa subsp. japonica GN=CML7 - [CML7_ORYSJ]                              | PTS(peroxisome)                                                                  |
| Q851Y1                 | 2.57  | 1   | <b>2.785</b> | 1.302        | 15.43 | 5    | 1.652        | 0.889 | Ankyrin repeat domain protein 2, putative, expressed OS=Oryza sativa subsp. japonica GN=OSJNBa0015N08.20 - [Q851Y1_ORYSJ] | unclear                                                                          |
| Q8H8B0                 | 11.96 | 2   | 1.255        | <b>0.247</b> | 7.61  | 2    | N.D.         | N.D.  | Os03g0159600 protein OS=Oryza sativa subsp. japonica GN=OJ1134F05.19 - [Q8H8B0_ORYSJ]                                     | Putative abscisic acid-induced protein                                           |
| Q9FTY4                 | 4.10  | 1   | <b>3.122</b> | <b>2.721</b> | 18.28 | 6    | 1.171        | 0.906 | Os01g0104400 protein OS=Oryza sativa subsp. japonica GN=P0436E04.19 - [Q9FTY4_ORYSJ]                                      | Ricin B-related lectin domain containing protein                                 |

**Translation, Transcription**

| Accession                   | Coverage | Peptide | hot                         |                              | Coverage | Peptide | control                     |                              | Description                                                                                                    | Sorting signal (localization predicted) |
|-----------------------------|----------|---------|-----------------------------|------------------------------|----------|---------|-----------------------------|------------------------------|----------------------------------------------------------------------------------------------------------------|-----------------------------------------|
|                             |          |         | Ratio (MSD1OE/WT for 4days) | Ratio (MSD1OE/WT for 10days) |          |         | Ratio (MSD1OE/WT for 4days) | Ratio (MSD1OE/WT for 10days) |                                                                                                                |                                         |
| <b>translation</b>          |          |         |                             |                              |          |         |                             |                              |                                                                                                                |                                         |
| P31674                      | 27.92    | 13      | 1.281                       | <b>2.385</b>                 | N.D.     | N.D.    | N.D.                        | N.D.                         | 40S ribosomal protein S15 OS=Oryza sativa subsp. japonica GN=RPS15 - [RS15_ORYSJ]                              | ribosome                                |
| P40978                      | 36.30    | 17      | 0.993                       | <b>2.033</b>                 | N.D.     | N.D.    | N.D.                        | N.D.                         | 40S ribosomal protein S19 OS=Oryza sativa subsp. japonica GN=RPS19A - [RS19_ORYSJ]                             | ribosome                                |
| P49216                      | 6.77     | 1       | 1.554                       | <b>3.508</b>                 | 6.77     | 2       | 1.058                       | 0.856                        | 40S ribosomal protein S26 OS=Oryza sativa subsp. japonica GN=RPS26 - [RS26_ORYSJ]                              | ribosome                                |
| P49398                      | 22.64    | 8       | 1.806                       | <b>2.369</b>                 | 27.55    | 18      | 1.292                       | <b>0.390</b>                 | 40S ribosomal protein S4 OS=Oryza sativa subsp. japonica GN=RPS4 - [RS4_ORYSJ]                                 | none (cytoplasm)                        |
| F51431                      | 39.35    | 60      | 1.478                       | <b>2.701</b>                 | N.D.     | N.D.    | N.D.                        | N.D.                         | Ubiquitin-40S ribosomal protein S27a-2 OS=Oryza sativa subsp. japonica GN=RPS27AB - [R27AB_ORYSJ]              | none (cytoplasm), NTS (nucleus)         |
| F56724                      | 20.17    | 3       | 1.283                       | <b>4.027</b>                 | 20.17    | 17      | 0.795                       | 1.636                        | 60S acidic ribosomal protein P3 OS=Oryza sativa subsp. japonica GN=Os06g0701400 - [RLA3_ORYSJ]                 | ribosome                                |
| Q0J0K10                     | 5.49     | 2       | 1.824                       | <b>2.361</b>                 | 24.73    | 14      | 1.655                       | <b>0.417</b>                 | 60S ribosomal protein L11 OS=Oryza sativa subsp. japonica GN=RPL11 - [RL11_ORYSJ]                              | cytoplasm                               |
| Q53JG0                      | 2.06     | 2       | <b>2.628</b>                | 0.853                        | 20.82    | 16      | 1.382                       | <b>0.467</b>                 | 60S ribosomal protein L3, putative, expressed OS=Oryza sativa subsp. japonica GN=RPL3B - [Q53JG0_ORYSJ]        | ribosome                                |
| Q5Z9S4                      | 5.80     | 1       | <b>2.218</b>                | <b>3.757</b>                 | 25.36    | 6       | 1.517                       | 0.636                        | 60S ribosomal protein S24 OS=Oryza sativa subsp. japonica GN=P045BE1.17 - [Q5Z9S4_ORYSJ]                       | ribosome                                |
| Q6H541                      | 5.80     | 1       | <b>2.905</b>                | <b>2.053</b>                 | N.D.     | N.D.    | N.D.                        | N.D.                         | 40S ribosomal protein S24 OS=Oryza sativa subsp. japonica GN=OSJNBa0035N08.11 - [Q6H541_ORYSJ]                 | ribosome                                |
| Q6ZF15                      | 10.38    | 3       | <b>2.078</b>                | <b>3.322</b>                 | N.D.     | N.D.    | N.D.                        | N.D.                         | Putative 60S ribosomal protein L9 OS=Oryza sativa subsp. japonica GN=OJ1435_F07.31 - [Q6ZF15_ORYSJ]            | ribosome                                |
| Q6ZLB8                      | 22.22    | 14      | 1.400                       | <b>2.152</b>                 | 52.84    | 76      | 1.516                       | <b>0.455</b>                 | Putative 60S ribosomal protein L4/L1 OS=Oryza sativa subsp. japonica GN=OJ1014_E08.28 - [Q6ZLB8_ORYSJ]         | ribosome                                |
| Q75G91                      | 5.70     | 4       | <b>2.184</b>                | 1.574                        | 33.77    | 22      | 1.927                       | 0.557                        | 40S ribosomal protein S3, putative, expressed OS=Oryza sativa subsp. japonica GN=Os03g0577000 - [Q75G91_ORYSJ] | ribosome                                |
| Q7F5L2                      | 2.51     | 1       | 1.507                       | <b>2.476</b>                 | 5.85     | 2       | 1.598                       | 1.244                        | Os01g0196600 protein OS=Oryza sativa subsp. japonica GN=P0419B01.3 - [Q7F5L2_ORYSJ]                            | Putative nucleotide diphosphatase       |
| Q8H2J8                      | 6.52     | 1       | 0.929                       | <b>2.088</b>                 | 12.32    | 12      | 1.544                       | 0.964                        | 40S ribosomal protein S12 OS=Oryza sativa subsp. japonica GN=OSJNBa0016A21.128-2 - [Q8H2J8_ORYSJ]              | ribosome                                |
| Q8L4F2                      | 20.42    | 5       | 1.474                       | <b>2.039</b>                 | 11.97    | 7       | 1.178                       | <b>0.281</b>                 | 40S ribosomal protein S23 OS=Oryza sativa subsp. japonica GN=P0460C04.38 - [Q8L4F2_ORYSJ]                      | ribosome                                |
| Q8L5X0                      | 15.45    | 2       | 1.200                       | <b>3.108</b>                 | N.D.     | N.D.    | N.D.                        | N.D.                         | 60S ribosomal protein L36 OS=Oryza sativa subsp. japonica GN=P0408C03.28 - [Q8L5X0_ORYSJ]                      | ribosome                                |
| Q9AY43                      | 8.82     | 2       | <b>2.356</b>                | <b>2.477</b>                 | 22.79    | 4       | 1.525                       | <b>0.408</b>                 | 60S ribosomal protein L27 OS=Oryza sativa GN=OSJNBa0027P10.10 - [Q9AY43_ORYSJ]                                 | ribosome                                |
| Q9LWS2                      | 9.62     | 4       | 1.469                       | <b>2.329</b>                 | 26.44    | 14      | 0.982                       | 1.105                        | 60S ribosomal protein L13 OS=Oryza sativa subsp. japonica GN=P0541H01.38 - [Q9LWS2_ORYSJ]                      | ribosome                                |
| Q9ZST1                      | 5.52     | 1       | <b>3.051</b>                | <b>2.919</b>                 | N.D.     | N.D.    | N.D.                        | N.D.                         | 30S ribosomal protein S17, chloroplastic OS=Oryza sativa subsp. japonica GN=RPS17 - [RR17_ORYSJ]               | unclear                                 |
| <b>Protein biosynthesis</b> |          |         |                             |                              |          |         |                             |                              |                                                                                                                |                                         |
| O64937                      | 17.00    | 27      | 2.011                       | <b>2.846</b>                 | 28.64    | 71      | <b>2.078</b>                | <b>0.496</b>                 | Elongation factor 1-alpha OS=Oryza sativa subsp. japonica GN=REFA1 - [EF1A_ORYSJ]                              | NTS (nucleus)                           |
| P29545                      | 46.88    | 39      | 1.032                       | <b>2.137</b>                 | 58.04    | 65      | 0.881                       | 1.305                        | Elongation factor 1-beta OS=Oryza sativa subsp. japonica GN=Os07g0662500 - [EF1B_ORYSJ]                        | NTS (nucleus)                           |

|                                               |         |    |              |               |       |      |       |              |                                                                                                                     |                                                           |  |
|-----------------------------------------------|---------|----|--------------|---------------|-------|------|-------|--------------|---------------------------------------------------------------------------------------------------------------------|-----------------------------------------------------------|--|
| P35683                                        | 12.08   | 13 | 1.877        | <b>2.313</b>  | 37.92 | 75   | 1.882 | 0.763        | Eukaryotic initiation factor 4A-1 OS=Oryza sativa subsp. japonica GN=Os06g0701100 - [JF4A1_ORYSJ]                   | ribosome                                                  |  |
| Q40680                                        | 29.69   | 31 | 1.033        | <b>2.163</b>  | 42.36 | 44   | 1.225 | 1.065        | Elongation factor 1-delta 1 OS=Oryza sativa subsp. japonica GN=Os07g0614500 - [EF1D1_ORYSJ]                         | none (cytoplasm)                                          |  |
| Q52627                                        | 10.82   | 5  | 1.855        | <b>2.420</b>  | 26.20 | 25   | 1.759 | 0.611        | Elongation factor 1-gamma 3 OS=Oryza sativa subsp. japonica GN=Os06g0571400 - [EF1G3_ORYSJ]                         | unclear                                                   |  |
| Q688X1                                        | 3.93    | 3  | <b>2.246</b> | 1.966         | 8.72  | 7    | 1.750 | 0.814        | Os05g0566500 protein OS=Oryza sativa subsp. japonica GN=OJ1781_H11.6 - [Q688X1_ORYSJ]                               | Putative eukaryotic translation initiation factor (EIF3d) |  |
| Q6H4L2                                        | 12.81   | 28 | <b>2.010</b> | <b>2.687</b>  | 40.21 | 157  | 1.710 | 0.673        | Elongation factor 2 OS=Oryza sativa subsp. japonica GN=P0461D06.32 - [Q6H4L2_ORYSJ]                                 | unclear                                                   |  |
| Q6K2P9                                        | 2.22    | 2  | 1.527        | <b>3.272</b>  | N.D.  | N.D. | N.D.  | N.D.         | Os09g0326900 protein OS=Oryza sativa subsp. japonica GN=P0706E03.4-1 - [Q6K2P9_ORYSJ]                               | Putative eukaryotic translation initiation factor 5       |  |
| Q6YSX0                                        | 30.00   | 17 | 1.498        | <b>2.280</b>  | 24.62 | 7    | 0.937 | 0.713        | Os07g0674200 protein OS=Oryza sativa subsp. japonica GN=P0037D09.3 - [Q6YSX0_ORYSJ]                                 | Putative 60S ribosomal protein L22                        |  |
| Q7XHW8                                        | 13.06   | 5  | 1.578        | <b>2.096</b>  | N.D.  | N.D. | N.D.  | N.D.         | Os07g0681000 protein OS=Oryza sativa subsp. japonica GN=OSJNBa0008J01.17 - [Q7XHW8_ORYSJ]                           | Putative translation initiation factor eIF-2 beta chain   |  |
| Q7XIK5                                        | 1056.00 | 3  | <b>2.357</b> | <b>6.595</b>  | 6.21  | 4    | 1.043 | <b>0.347</b> | Os04g0613600 protein OS=Oryza sativa subsp. japonica GN=OJ1773_H01.103 - [Q7XIK5_ORYSJ]                             | Putative 40S ribosomal protein S11                        |  |
| Q7Y1V2                                        | 14.58   | 4  | 1.132        | <b>2.665</b>  | 22.92 | 3    | 1.512 | 0.826        | Eukaryotic translation initiation factor 1A OS=Oryza sativa subsp. japonica GN=eif-1a-OF2 - [Q7Y1V2_ORYSJ]          | none (cytoplasm)                                          |  |
| Q84ZK1                                        | 11.25   | 8  | 1.344        | <b>2.799</b>  | 18.75 | 16   | 1.335 | 1.046        | Os07g0597000 protein OS=Oryza sativa subsp. japonica GN=P0453E05.118 - [Q84ZK1_ORYSJ]                               | Translation initiation factor 5A                          |  |
| Q8H684                                        | 8.70    | 5  | <b>0.489</b> | 0.895         | 3.68  | 1    | 1.712 | 1.102        | OSEYA1 OS=Oryza sativa subsp. japonica GN=OSJNBa0004I20.20 - [Q8H684_ORYSJ]                                         | none (cytoplasm)                                          |  |
| Q8LNW1                                        | 4.27    | 1  | 1.374        | <b>4.337</b>  | 18.29 | 2    | 0.985 | 1.308        | Os10g0483000 protein OS=Oryza sativa subsp. japonica GN=OSJNBa0012L23.32 - [Q8LNW1_ORYSJ]                           | Transcription factor BTF3, putative, expressed            |  |
| <b>nucleosome assembly</b>                    |         |    |              |               |       |      |       |              |                                                                                                                     |                                                           |  |
| Q2RAD9                                        | 6.62    | 1  | <b>2.786</b> | <b>5.588</b>  | 5.15  | 1    | 1.434 | <b>0.425</b> | Histone H3.2 OS=Oryza sativa subsp. japonica GN=Os01g0866200 - [H32_ORYSJ]                                          | NTS (nucleus)                                             |  |
| Q53WK4                                        | 14.56   | 9  | 1.172        | <b>2.461</b>  | 24.73 | 15   | 1.324 | 0.945        | Os05g0539700 protein OS=Oryza sativa subsp. japonica GN=OSJNBa0052K01.18 - [Q53WK4_ORYSJ]                           | Putative nucleosome assembly protein                      |  |
| Q5VND6                                        | 11.64   | 6  | 1.223        | <b>2.532</b>  | 20.90 | 16   | 1.138 | 1.344        | Os06g0149400 protein OS=Oryza sativa subsp. japonica GN=P0710H01.4 - [Q5VND6_ORYSJ]                                 | Putative nucleosome assembly protein 1                    |  |
| Q688F7                                        | 17.85   | 10 | <b>2.088</b> | <b>4.682</b>  | 7.74  | 4    | 0.918 | <b>0.318</b> | Putative histone deacetylase HD2 OS=Oryza sativa subsp. japonica GN=OSJNBa0035I01.3 - [Q688F7_ORYSJ]                | none (cytoplasm)                                          |  |
| Q69JW2                                        | 29.76   | 7  | <b>3.086</b> | <b>9.999</b>  | 34.52 | 12   | 1.398 | 1.018        | Os02g0576700 protein OS=Oryza sativa subsp. japonica GN=B1342F01.10 - [Q69JW2_ORYSJ]                                | none (cytoplasm)                                          |  |
| Q6AVQ4                                        | 7.77    | 2  | <b>0.421</b> | 0.681         | 19.08 | 8    | 1.090 | N.D.         | Putative prohibitin OS=Oryza sativa subsp. japonica GN=OSJNBa0075M12.18 - [Q6AVQ4_ORYSJ]                            | unclear                                                   |  |
| Q6F362                                        | 28.95   | 7  | <b>2.094</b> | <b>3.652</b>  | N.D.  | N.D. | N.D.  | N.D.         | Histone H2B.9 OS=Oryza sativa subsp. japonica GN=H2B.9 - [H2B9_ORYSJ]                                               | NTS (nucleus)                                             |  |
| <b>nucleic acid binding</b>                   |         |    |              |               |       |      |       |              |                                                                                                                     |                                                           |  |
| Q5W6H1                                        | 5.34    | 2  | <b>2.036</b> | 1.976         | 25.95 | 31   | 1.538 | 0.921        | Os05g0350500 protein OS=Oryza sativa subsp. japonica GN=OSJNBa0077J17.8 - [Q5W6H1_ORYSJ]                            | Putative DNA-binding protein GBP16                        |  |
| Q5ZDX8                                        | 1.79    | 1  | 1.521        | <b>2.651</b>  | 8.05  | 2    | 0.812 | 2.357        | Heterogeneous nuclear ribonucleoprotein A2/B1-like OS=Oryza sativa subsp. japonica GN=P0410E01.38 - [Q5ZDX8_ORYSJ]  | NTS (nucleus)                                             |  |
| Q60DW3                                        | 10.85   | 2  | 1.412        | <b>2.231</b>  | 3.10  | 1    | 1.862 | 0.965        | Os05g0419100 protein OS=Oryza sativa subsp. japonica GN=P0426G01.9 - [Q60DW3_ORYSJ]                                 | Putative nucleic acid binding protein                     |  |
| Q6ASX7                                        | 16.05   | 7  | 1.003        | <b>2.649</b>  | 32.72 | 36   | 1.410 | 1.017        | Glycine-rich RNA binding protein OS=Oryza sativa subsp. japonica GN=B1130H05.5 - [Q6ASX7_ORYSJ]                     | unclear                                                   |  |
| Q6K6Z4                                        | 7.29    | 2  | 1.775        | <b>2.900</b>  | 16.03 | 7    | 1.542 | 0.885        | KH domain-containing protein NOVA-like OS=Oryza sativa subsp. japonica GN=P0474F11.35 - [Q6K6Z4_ORYSJ]              | unclear                                                   |  |
| Q6YVY1                                        | 4.23    | 3  | 1.256        | <b>2.132</b>  | 28.55 | 40   | 1.550 | 1.071        | Os09g0115400 protein OS=Oryza sativa subsp. japonica GN=OJ1310_F05.15 - [Q6YVY1_ORYSJ]                              | Poly(A)-binding protein                                   |  |
| Q6Z1C0                                        | 1.22    | 1  | 1.282        | <b>2.147</b>  | N.D.  | N.D. | N.D.  | N.D.         | Os08g0192900 protein OS=Oryza sativa subsp. japonica GN=OSJNBa0056O06.24 - [Q6Z1C0_ORYSJ]                           | Putative nucleolin                                        |  |
| Q7F2X8                                        | 14.67   | 4  | <b>3.486</b> | <b>10.380</b> | 25.33 | 10   | 1.290 | 1.057        | Os01g0916600 protein OS=Oryza sativa subsp. japonica GN=P0004D12.37 - [Q7F2X8_ORYSJ]                                | OSGRP2                                                    |  |
| Q8W0D1                                        | 23.95   | 10 | 1.229        | <b>2.184</b>  | N.D.  | N.D. | N.D.  | N.D.         | Os01g0721900 protein OS=Oryza sativa subsp. japonica GN=P0690B02.26-1 - [Q8W0D1_ORYSJ]                              | Putative nuclear RNA binding protein A                    |  |
| Q94D20                                        | 2.60    | 2  | <b>4.390</b> | <b>3.837</b>  | 8.20  | 4    | 1.868 | 0.564        | Nucleoid DNA-binding protein cnd41-like OS=Oryza sativa subsp. japonica GN=P0025A05.25 - [Q94D20_ORYSJ]             | SP (secretory)                                            |  |
| Q9FW37                                        | 20.15   | 2  | 1.707        | <b>2.741</b>  | 8.21  | 2    | 1.535 | 1.003        | Os05g0100800 protein OS=Oryza sativa subsp. japonica GN=P0036E10.5 - [Q9FW37_ORYSJ]                                 | Putative uncharacterized protein                          |  |
| Q9FWK8                                        | 5.82    | 1  | <b>2.840</b> | <b>4.303</b>  | 12.28 | 13   | 1.308 | 1.148        | Putative RNA binding protein OS=Oryza sativa subsp. japonica GN=OSJNBa0079L16.15 - [Q9FWK8_ORYSJ]                   | unclear                                                   |  |
| <b>DNA recombination, repair, replication</b> |         |    |              |               |       |      |       |              |                                                                                                                     |                                                           |  |
| Q5Z6P9                                        | 9.44    | 13 | 1.269        | <b>3.021</b>  | 29.24 | 12   | 1.352 | 1.271        | Os06g0264300 protein OS=Oryza sativa subsp. japonica GN=OJ1001_B06.1 - [Q5Z6P9_ORYSJ]                               | Similar to RAD23                                          |  |
| Q6H734                                        | 9.88    | 4  | 1.087        | <b>2.304</b>  | 21.93 | 17   | 1.440 | 1.075        | Os02g0198600 protein OS=Oryza sativa subsp. japonica GN=P0026H03.19 - [Q6H734_ORYSJ]                                | Putative DNA-damage inducible protein                     |  |
| Q7F953                                        | 2.55    | 2  | <b>0.128</b> | <b>0.483</b>  | N.D.  | N.D. | N.D.  | N.D.         | OSJNBb0002J11.12 protein OS=Oryza sativa subsp. japonica GN=OSJNBb0002J11.12 - [Q7F953_ORYSJ]                       | mismatch repair                                           |  |
| Q7XD67                                        | 0.74    | 1  | <b>3.021</b> | <b>4.280</b>  | 0.74  | 1    | 1.751 | 0.813        | DNA ligase OS=Oryza sativa subsp. japonica GN=B1288B10.3 - [Q7XD67_ORYSJ]                                           | unclear                                                   |  |
| Q8H0A5                                        | 1.16    | 1  | <b>0.107</b> | N.D.          | 1.160 | 1    | N.D.  | N.D.         | Retrotransposon protein, putative, unclassified OS=Oryza sativa subsp. japonica GN=LOC_Os10g37940 - [Q8H0A5_ORYSJ]  | NTS (nucleus)                                             |  |
| <b>RNA splicing</b>                           |         |    |              |               |       |      |       |              |                                                                                                                     |                                                           |  |
| Q0JMJ17-2                                     | 3.49    | 3  | <b>2.553</b> | 1.686         | N.D.  | N.D. | N.D.  | N.D.         | Isoform 2 of DEAD-box ATP-dependent RNA helicase 56 OS=Oryza sativa subsp. japonica GN=Os01g0549700 - [RH56_ORYSJ]  | unclear                                                   |  |
| Q6EUD5                                        | 1.52    | 4  | 1.785        | <b>3.489</b>  | 3.91  | 2    | N.D.  | 1.743        | Os02g0245000 protein OS=Oryza sativa subsp. japonica GN=OJ1134_F06.6 - [Q6EUD5_ORYSJ]                               | Putative splicing factor 3a                               |  |
| <b>others</b>                                 |         |    |              |               |       |      |       |              |                                                                                                                     |                                                           |  |
| Q53QG2                                        | 6.48    | 1  | <b>0.495</b> | 1.313         | N.D.  | N.D. | N.D.  | N.D.         | Os11g0153800 protein OS=Oryza sativa subsp. japonica GN=Os11g0153800 - [Q53QG2_ORYSJ]                               | Ribonucleoprotein                                         |  |
| Q6YTE9                                        | 5.65    | 1  | <b>0.179</b> | 1.248         | N.D.  | N.D. | N.D.  | N.D.         | Epstein-Barr virus EBNA-1-like protein OS=Oryza sativa subsp. japonica GN=P0025F02.34 - [Q6YTE9_ORYSJ]              | unclear                                                   |  |
| Q7X140                                        | 8.01    | 3  | <b>2.231</b> | <b>4.010</b>  | N.D.  | N.D. | N.D.  | N.D.         | Os07g0624700 protein OS=Oryza sativa subsp. japonica GN=P0524E08.133 - [Q7X140_ORYSJ]                               | UMP/CMP kinase a                                          |  |
| Q7XXR8                                        | 9.76    | 6  | 1.556        | <b>2.721</b>  | N.D.  | N.D. | N.D.  | N.D.         | Nascent polypeptide associated complex alpha chain OS=Oryza sativa subsp. japonica GN=Os05g0373700 - [Q7XXR8_ORYSJ] | none (cytoplasm)                                          |  |

### Transport

| Accession | Coverage | Peptide | hot                         |                              | control  |         | Description | Sorting signal (localization predicted) |                                                                                                       |                                               |
|-----------|----------|---------|-----------------------------|------------------------------|----------|---------|-------------|-----------------------------------------|-------------------------------------------------------------------------------------------------------|-----------------------------------------------|
|           |          |         | Ratio (MSD10E/WT for 4days) | Ratio (MSD10E/WT for 10days) | Coverage | Peptide |             |                                         | Ratio (MSD10E/WT for 4days)                                                                           | Ratio (MSD10E/WT for 10days)                  |
| P31691    | 13.55    | 11      | <b>2.316</b>                | <b>2.039</b>                 | 29.84    | 50      | 1.761       | 0.639                                   | ADP, ATP carrier protein, mitochondrial OS=Oryza sativa subsp. japonica GN=Os02g0718900 - [ADT_ORYSJ] | unclear                                       |
| Q53MW2    | 11.11    | 2       | 0.637                       | <b>0.401</b>                 | 11.11    | 1       | 1.599       | 1.602                                   | Non-specific lipid-transfer protein OS=Oryza sativa subsp. japonica GN=Os11g0427800 - [Q53MW2_ORYSJ]  | SP (secretory)                                |
| Q5N7W3    | 1.58     | 2       | <b>2.530</b>                | N.D.                         | 3.87     | 2       | 1.709       | 0.950                                   | Os01g0911200 protein OS=Oryza sativa subsp. japonica GN=P0470A12.10 - [Q5N7W3_ORYSJ]                  | unclear                                       |
| Q651T8    | 4.35     | 3       | <b>2.508</b>                | <b>0.958</b>                 | 36.45    | 52      | 1.818       | 0.888                                   | Os06g0682000 protein OS=Oryza sativa subsp. japonica GN=OSJNBa0051O02.43 - [Q651T8_ORYSJ]             | Putative vacuolar proton-ATPase               |
| Q65XV6    | 26.71    | 5       | <b>0.358</b>                | <b>0.431</b>                 | 49.32    | 22      | 1.521       | 1.239                                   | Os05g011200 protein OS=Oryza sativa subsp. japonica GN=P0016H04.12 - [Q65XV6_ORYSJ]                   | Putative amino acid selective channel protein |
| Q69TX3    | 7.61     | 5       | <b>2.831</b>                | 1.080                        | 15.76    | 18      | 1.166       | N.D.                                    | Os06g0210500 protein OS=Oryza sativa subsp. japonica GN=P0021C04.12 - [Q69TX3_ORYSJ]                  | Putative mitochondrial phosphate transporter  |

| Accession | Coverage | Peptide | hot<br>Ratio<br>(MSD1OE/WT for 4days) | hot<br>Ratio<br>(MSD1OE/WT for 10days) | control<br>Coverage | control<br>Peptide | control<br>Ratio<br>(MSD1OE/WT for 4days) | control<br>Ratio<br>(MSD1OE/WT for 10days) | Description                                                                                                     | Sorting signal<br>(localization predicted) |                  |
|-----------|----------|---------|---------------------------------------|----------------------------------------|---------------------|--------------------|-------------------------------------------|--------------------------------------------|-----------------------------------------------------------------------------------------------------------------|--------------------------------------------|------------------|
| Q6Z782    | 17.65    | 13      | <b>0.369</b>                          | 0.918                                  | 31.53               | 45                 | 1.229                                     | 0.501                                      | Os02g0202400 protein OS=Oryza sativa subsp. japonica GN=P0419A09.38 - [Q6Z782_ORYSJ]                            | Putative Brittle-1 protein, chloroplast    | unclear          |
| Q7F270    | 4.42     | 4       | <b>2.467</b>                          | 2.325                                  | 43.65               | 41                 | 1.467                                     | 0.965                                      | ADP-ribosylation factor 1 OS=Oryza sativa subsp. japonica GN=OJ1118_B03.103 - [Q7F270_ORYSJ]                    |                                            | unclear          |
| Q8H852    | 0.90     | 1       | <b>1.280</b>                          | <b>2.216</b>                           | 7.69                | 8                  | 1.684                                     | 0.753                                      | Coatomer subunit gamma-1 OS=Oryza sativa subsp. japonica GN=Os03g0227000 - [COPG1_ORYSJ]                        |                                            | none (cytoplasm) |
| Q9FWV2    | 3.44     | 4       | 0.623                                 | <b>3.086</b>                           | 18.72               | 33                 | 1.703                                     | 1.264                                      | Putative chloroplast inner envelope protein OS=Oryza sativa subsp. japonica GN=OSJNBa0051D19.7 - [Q9FWV2_ORYSJ] |                                            | cTP (plastid)    |
| Q9FWV6    | 17.05    | 2       | <b>0.372</b>                          | N. D                                   | N. D                | N. D               | N. D                                      | N. D                                       | Probable aquaporin TIP3-1 OS=Oryza sativa subsp. japonica GN=TIP3-1 - [TIP31_ORYSJ]                             |                                            | unclear          |

### Cell wall, cytoskeleton

| Accession | Coverage | Peptide | hot<br>Ratio<br>(MSD1OE/WT for 4days) | hot<br>Ratio<br>(MSD1OE/WT for 10days) | control<br>Coverage | control<br>Peptide | control<br>Ratio<br>(MSD1OE/WT for 4days) | control<br>Ratio<br>(MSD1OE/WT for 10days) | Description                                                                               | Sorting signal<br>(localization predicted) |                  |
|-----------|----------|---------|---------------------------------------|----------------------------------------|---------------------|--------------------|-------------------------------------------|--------------------------------------------|-------------------------------------------------------------------------------------------|--------------------------------------------|------------------|
| P28752    | 14.00    | 12      | <b>2.723</b>                          | <b>5.167</b>                           | 36.89               | 71                 | 1.721                                     | 0.772                                      | Tubulin alpha-1 chain OS=Oryza sativa subsp. japonica GN=TUBA1 - [TBA1_ORYSJ]             |                                            | none (cytoplasm) |
| P45960    | 17.23    | 21      | <b>2.800</b>                          | <b>3.339</b>                           | 40.27               | 123                | 1.528                                     | 0.619                                      | Tubulin beta-4 chain OS=Oryza sativa subsp. japonica GN=TUBB4 - [TBB4_ORYSJ]              |                                            | none (cytoplasm) |
| Q40665-1  | 19.96    | 28      | 1.950                                 | <b>2.578</b>                           | N. D                | N. D               | N. D                                      | N. D                                       | Isoform 1 of Tubulin beta-3 chain OS=Oryza sativa subsp. japonica GN=TUBB3 - [TBB3_ORYSJ] |                                            | none (cytoplasm) |
| Q53M52    | 13.97    | 14      | <b>3.383</b>                          | <b>3.836</b>                           | 38.36               | 96                 | 1.704                                     | 0.617                                      | Tubulin alpha-2 chain OS=Oryza sativa subsp. japonica GN=TUBA - [TBA2_ORYSJ]              |                                            | none (cytoplasm) |
| Q53NL5    | 19.66    | 8       | <b>0.134</b>                          | 0.902                                  | 30.00               | 25                 | 1.233                                     | 0.796                                      | Xylanase inhibitor protein 2 OS=Oryza sativa subsp. japonica GN=Chib3H-h - [XIP2_ORYSJ]   |                                            | SP (secretory)   |
| Q75LL2    | 0.71     | 1       | <b>0.193</b>                          | 0.552                                  | 1.74                | 3                  | 1.760                                     | 1.744                                      | Kinesin-like protein OS=Oryza sativa subsp. japonica GN=OSJNBa0047E24.25 - [Q75LL2_ORYSJ] |                                            | NTS (nucleus)    |

### Morphogenesis (embryogenesis, flowering, seed set)

| Accession | Coverage | Peptide | hot<br>Ratio<br>(MSD1OE/WT for 4days) | hot<br>Ratio<br>(MSD1OE/WT for 10days) | control<br>Coverage | control<br>Peptide | control<br>Ratio<br>(MSD1OE/WT for 4days) | control<br>Ratio<br>(MSD1OE/WT for 10days) | Description                                                                                                               | Sorting signal<br>(localization predicted)                     |                  |
|-----------|----------|---------|---------------------------------------|----------------------------------------|---------------------|--------------------|-------------------------------------------|--------------------------------------------|---------------------------------------------------------------------------------------------------------------------------|----------------------------------------------------------------|------------------|
| P46520    | 51.58    | 10      | <b>0.185</b>                          | <b>0.120</b>                           | 12.63               | 1                  | N. D                                      | 4.371                                      | Embryonic abundant protein 1 OS=Oryza sativa subsp. japonica GN=EMP1 - [EMP1_ORYSJ]                                       |                                                                | none (cytoplasm) |
| Q656A5    | 6.82     | 1       | <b>0.265</b>                          | <b>0.366</b>                           | 18.18               | 3                  | 1.254                                     | 1.822                                      | Os06g0498800 protein OS=Oryza sativa subsp. japonica GN=P0596H06.13 - [Q656A5_ORYSJ]                                      | Putative terminal flower 1                                     | NTS (nucleus)    |
| Q656J2    | 4.91     | 2       | 0.606                                 | <b>0.193</b>                           | 16.23               | 6                  | 1.596                                     | 1.171                                      | Os06g0503400 protein OS=Oryza sativa subsp. japonica GN=P0564B04.17 - [Q656J2_ORYSJ]                                      | Putative 24 kDa seed maturation protein                        | unclear          |
| Q6KA29    | 15.29    | 10      | 0.703                                 | <b>0.258</b>                           | 2.76                | 1                  | N. D                                      | N. D                                       | Os02g0250600 protein OS=Oryza sativa subsp. japonica GN=OJ1113_G05.23 - [Q6KA29_ORYSJ]                                    | Putative late embryogenesis abundant domain-containing protein | unclear          |
| Q6YZA9    | 14.03    | 11      | 1.259                                 | <b>0.452</b>                           | 9.95                | 14                 | 1.544                                     | 1.229                                      | Germin-like protein 8-2 OS=Oryza sativa subsp. japonica GN=GER3 - [GL82_ORYSJ]                                            |                                                                | SP (secretory)   |
| Q6Z010    | 20.00    | 3       | 0.780                                 | <b>0.361</b>                           | N. D                | N. D               | N. D                                      | N. D                                       | Os08g0327700 protein OS=Oryza sativa subsp. japonica GN=OSJNBa0049I01.9 - [Q6Z010_ORYSJ]                                  | Putative seed maturation protein                               | unclear          |
| Q6ZK46    | 7.91     | 15      | 1.905                                 | <b>0.172</b>                           | 13.56               | 13                 | 1.299                                     | 1.573                                      | Os08g0127900 protein OS=Oryza sativa subsp. japonica GN=OJ1163_G08.32 - [Q6ZK46_ORYSJ]                                    | Putative early embryogenesis protein                           | SP (secretory)   |
| Q8H8H1    | 14.66    | 6       | 0.973                                 | <b>2.950</b>                           | 14.66               | 1                  | 0.857                                     | 0.843                                      | Agamous-like MADS box protein AGL14, putative, expressed OS=Oryza sativa subsp. japonica GN=OJ1126B12.10 - [Q8H8H1_ORYSJ] |                                                                | NTS (nucleus)    |

### Allergen

| Accession | Coverage | Peptide | hot<br>Ratio<br>(MSD1OE/WT for 4days) | hot<br>Ratio<br>(MSD1OE/WT for 10days) | control<br>Coverage | control<br>Peptide | control<br>Ratio<br>(MSD1OE/WT for 4days) | control<br>Ratio<br>(MSD1OE/WT for 10days) | Description                                                                             | Sorting signal<br>(localization predicted)             |                      |
|-----------|----------|---------|---------------------------------------|----------------------------------------|---------------------|--------------------|-------------------------------------------|--------------------------------------------|-----------------------------------------------------------------------------------------|--------------------------------------------------------|----------------------|
| Q01881    | 16.25    | 68      | 0.512                                 | <b>0.380</b>                           | 24.38               | 54                 | 1.185                                     | 1.557                                      | Seed allergenic protein RA5 OS=Oryza sativa subsp. japonica GN=RA5 - [RA05_ORYSJ]       |                                                        | SP (secretory)       |
| Q01882    | 6.02     | 14      | <b>0.247</b>                          | <b>0.135</b>                           | 6.02                | 11                 | 1.217                                     | <b>2.144</b>                               | Seed allergenic protein RAG2 OS=Oryza sativa subsp. japonica GN=RAG2 - [RAG2_ORYSJ]     |                                                        | SP (secretory)       |
| Q6ZD29    | 14.57    | 3       | <b>0.137</b>                          | <b>0.238</b>                           | 68.87               | 29                 | 1.117                                     | 1.021                                      | Os08g0374000 protein OS=Oryza sativa subsp. japonica GN=P0690C12.27 - [Q6ZD29_ORYSJ]    | Bet v I allergen family protein. Cereal seed allergen. | unclear              |
| Q7X7E6    | 5.70     | 11      | <b>0.175</b>                          | <b>0.144</b>                           | 11.39               | 29                 | 1.409                                     | 1.682                                      | Os07g0216600 protein OS=Oryza sativa subsp. japonica GN=OJ1080_F08.102 - [Q7X7E6_ORYSJ] | trypsin/alpha-amylase inhibitor family protein.        | SP (secretory)       |
| Q8H4L8    | 18.47    | 7       | <b>0.100</b>                          | <b>0.063</b>                           | 10.19               | 8                  | 1.724                                     | 1.702                                      | Allergen RA16 OS=Oryza sativa subsp. japonica GN=OJ1116_C08.118 - [Q8H4L8_ORYSJ]        |                                                        | SP (secretory)       |
| Q8H4M4    | 13.13    | 10      | <b>0.188</b>                          | <b>0.054</b>                           | 10.00               | 11                 | 1.404                                     | 1.940                                      | Allergenic protein OS=Oryza sativa subsp. japonica GN=OJ1116_C08.108 - [Q8H4M4_ORYSJ]   |                                                        | SP (plasma membrane) |
| Q8H559    | 8.55     | 2       | <b>0.477</b>                          | 0.716                                  | 15.79               | 8                  | 1.912                                     | 0.845                                      | Os07g0159800 protein OS=Oryza sativa subsp. japonica GN=OJ1714_H10.115 - [Q8H559_ORYSJ] | E1 protein and Def2/Der2 allergen family protein       | SP (secretory)       |

### Cell organization

| Accession | Coverage | Peptide | hot<br>Ratio<br>(MSD1OE/WT for 4days) | hot<br>Ratio<br>(MSD1OE/WT for 10days) | control<br>Coverage | control<br>Peptide | control<br>Ratio<br>(MSD1OE/WT for 4days) | control<br>Ratio<br>(MSD1OE/WT for 10days) | Description                                                                            | Sorting signal<br>(localization predicted)      |                      |
|-----------|----------|---------|---------------------------------------|----------------------------------------|---------------------|--------------------|-------------------------------------------|--------------------------------------------|----------------------------------------------------------------------------------------|-------------------------------------------------|----------------------|
| Q6K8D4    | 5.36     | 1       | 1.663                                 | <b>3.196</b>                           | 30.36               | 8                  | 1.618                                     | 1.085                                      | Os02g0760300 protein OS=Oryza sativa subsp. japonica GN=OJ1175_B01.15 - [Q6K8D4_ORYSJ] | Putative immunophilin                           | PTS(peroxisome)      |
| Q6Z347    | 4.51     | 4       | 1.698                                 | <b>3.208</b>                           | 20.68               | 4                  | 1.860                                     | 1.171                                      | Os02g0726000 protein OS=Oryza sativa subsp. japonica GN=B1121A12.6 - [Q6Z347_ORYSJ]    | Putative fasciclin-like arabinogalactan-protein | SP (plasma membrane) |

### Unknown

| Accession | Coverage | Peptide | hot<br>Ratio<br>(MSD1OE/WT for 4days) | hot<br>Ratio<br>(MSD1OE/WT for 10days) | control<br>Coverage | control<br>Peptide | control<br>Ratio<br>(MSD1OE/WT for 4days) | control<br>Ratio<br>(MSD1OE/WT for 10days) | Description                                                                                                          | Sorting signal<br>(localization predicted) |                  |
|-----------|----------|---------|---------------------------------------|----------------------------------------|---------------------|--------------------|-------------------------------------------|--------------------------------------------|----------------------------------------------------------------------------------------------------------------------|--------------------------------------------|------------------|
| Q5W645    | 5.51     | 3       | <b>2.936</b>                          | <b>3.647</b>                           | 3.81                | 2                  | N. D                                      | N. D                                       | Os05g0349500 protein OS=Oryza sativa subsp. japonica GN=OSJNBb0052F16.17 - [Q5W645_ORYSJ]                            |                                            | none (cytoplasm) |
| Q5W6H0    | 24.80    | 7       | <b>2.096</b>                          | <b>3.292</b>                           | 22.40               | 7                  | 1.628                                     | 1.122                                      | Putative uncharacterized protein OSJNBa0077J17.9 OS=Oryza sativa subsp. japonica GN=OSJNBa0077J17.9 - [Q5W6H0_ORYSJ] |                                            | unclear          |
| Q657K0    | 5.15     | 1       | <b>0.128</b>                          | <b>0.283</b>                           | 5.15                | 2                  | 0.683                                     | 1.367                                      | Os01g0567200 protein OS=Oryza sativa subsp. japonica GN=P0002B05.18 - [Q657K0_ORYSJ]                                 |                                            | NTS (nucleus)    |

|        |       |   |              |               |       |     |              |       |                                                                                                                        |                     |
|--------|-------|---|--------------|---------------|-------|-----|--------------|-------|------------------------------------------------------------------------------------------------------------------------|---------------------|
| Q69LX0 | 3.64  | 1 | <b>3.697</b> | <b>12.378</b> | 3.64  | 1   | <b>2.018</b> | 0.781 | Putative uncharacterized protein OSJNBa0057D11.11 OS=Oryza sativa subsp. japonica GN=OSJNBa0057D11.11 - [Q69LX0_ORYSJ] | unclear             |
| Q69RX0 | 7.22  | 1 | <b>2.637</b> | <b>4.227</b>  | N.D   | N.D | N.D          | N.D   | Putative uncharacterized protein OS=Oryza sativa subsp. japonica GN=OSJNBa0058D03.120 - [Q69RX0_ORYSJ]                 | none (cytoplasm)    |
| Q6K316 | 15.15 | 1 | <b>0.144</b> | <b>0.219</b>  | N.D   | N.D | N.D          | N.D   | Putative uncharacterized protein OSJNBb0066C12.15 OS=Oryza sativa subsp. japonica GN=OSJNBb0066C12.15 - [Q6K316_ORYSJ] | unclear             |
| Q6YYB0 | 3.29  | 1 | <b>2.684</b> | <b>3.960</b>  | 5.16  | 3   | 1.288        | 1.156 | Uncharacterized protein Os08g0359500 OS=Oryza sativa subsp. japonica GN=Os08g0359500 - [Y8359_ORYSJ]                   | PTS(peroxisome)     |
| Q6Z4T7 | 1.96  | 1 | 1.613        | <b>2.470</b>  | N.D   | N.D | N.D          | N.D   | Os08g0175200 protein OS=Oryza sativa subsp. japonica GN=OSJNBa0054L03.38 - [Q6Z4T7_ORYSJ]                              | none (cytoplasm)    |
| Q6ZB13 | 6.25  | 1 | <b>0.322</b> | <b>0.373</b>  | N.D   | N.D | N.D          | N.D   | Putative uncharacterized protein OJ1449_H02.17 OS=Oryza sativa subsp. japonica GN=OJ1449_H02.17 - [Q6ZB13_ORYSJ]       | unclear             |
| Q6ZHP6 | 36.63 | 2 | <b>0.149</b> | <b>0.383</b>  | 36.63 | 9   | 1.634        | 1.607 | Os02g0715400 protein OS=Oryza sativa subsp. japonica GN=OJ1191_G08.15 - [Q6ZHP6_ORYSJ]                                 | unclear             |
| Q7EZB3 | 7.08  | 1 | <b>2.141</b> | <b>2.918</b>  | N.D   | N.D | N.D          | N.D   | Putative uncharacterized protein P0689E12.5 OS=Oryza sativa subsp. japonica GN=P0700D12.129 - [Q7EZB3_ORYSJ]           | unclear             |
| Q7EZS5 | 13.79 | 1 | <b>2.570</b> | <b>3.306</b>  | N.D   | N.D | N.D          | N.D   | Putative uncharacterized protein OJ1163_G08.42 OS=Oryza sativa subsp. japonica GN=P0582D05.141 - [Q7EZS5_ORYSJ]        | unclear             |
| Q7XU87 | 1.18  | 1 | <b>3.165</b> | <b>3.350</b>  | N.D   | N.D | N.D          | N.D   | OSJNBa0029H02.25 protein OS=Oryza sativa GN=OSJNBa0029H02.25 - [Q7XU87_ORYSA]                                          | NTS (nucleus)       |
| Q84MQ0 | 2.99  | 1 | <b>2.206</b> | <b>2.209</b>  | 8.98  | 2   | 1.605        | 0.638 | Putative uncharacterized protein OSJNBb0036F07.11 OS=Oryza sativa subsp. japonica GN=OSJNBb0036F07.11 - [Q84MQ0_ORYSJ] | none (cytoplasm)    |
| Q9FU80 | 2.65  | 2 | <b>2.187</b> | <b>3.675</b>  | 15.91 | 10  | 1.218        | 1.095 | Os01g0143300 protein OS=Oryza sativa subsp. japonica GN=P0019D06.31 - [Q9FU80_ORYSJ]                                   | mTP (mitochondrion) |
