# Supplementary material for: Golgi/plastid‐type manganese superoxide dismutase involved in heat‐stress tolerance during grain filling of rice
Source: PubMed Central journal article supplement — Plant Biotechnol J. 2015 Jan 14;13(9):1251–63. doi: 10.1111/pbi.12314 (PMC6680209; doi:10.1111/pbi.12314), 2015-01-14
Supplement: PBI-13-1251-s005.pdf [file PBI-13-1251-s005.pdf]

**Table S2.** Plasmids used in this study.

| Constructed plasmids                                                                             | DNA template                      | Primer sequences                                                          |
|--------------------------------------------------------------------------------------------------|-----------------------------------|---------------------------------------------------------------------------|
| pESWA<br>(Islam et al., 2005)                                                                    |                                   |                                                                           |
| pWX-WB-MSD1-RNAi                                                                                 | pME18SFL-3[AK070528]<br>(pOsMSD1) | 5'-CACCAGGAAAACCCTAGCCG-3'<br>5'-TCAAGCAGTCGCATTTTCGTACACC-3'             |
| pH35GY<br>(Kubo et al., 2005)                                                                    |                                   |                                                                           |
| pH35GY-(AAGCTT)-YFP                                                                              | pME18SFL3[AK121320]<br>(pOsEMP70) | 5'-CACCAAGCTTGTTTCATGGAGATGTGTTTC-3'<br>5'-AAGCTTGCTCGGGGATCTGCCTTGGAA-3' |
| pH35GY-OsMSD1-YFP                                                                                | pME18SFL-3[AK104160]<br>(pOsMSD1) | 5'-CACCATGGCGCTCCGCACGC-3'<br>5'-AGCAGTCGCATTTTCGTACACC-3'                |
| pST-mRFP<br>(Matsuura-Tokita et al., 2006)                                                       |                                   |                                                                           |
| pWxTP-DsRed<br>(Kitajima et al., 2009)                                                           |                                   |                                                                           |
| pMT121-ARF1 T31N,<br>pMT121-ARF1 Q71L,<br>and pMT121-SAR1 H74L,<br>(Takeuchi et al., 2000; 2002) |                                   |                                                                           |

**Table S3.** Real-time PCR primer sets

| Target DNA                    | Primer sequences                                          |
|-------------------------------|-----------------------------------------------------------|
| <i>MSD1</i><br>(AK070528)     | 5'-AGGTGCTGCTTTACAAGGA-3'<br>5'-CCCAACAAAGGAACCAAGTT-3'   |
| <i>18S rRNA</i><br>(AK059783) | 5'-CTGGTGACGGGTGACGGAGAAT-3'<br>5'-CGCCTGCTGCCTTCCTTGG-3' |
